1

2

3

4

5

6

7

8 **A functional analysis of the *Drosophila* gene *hindsight*: evidence for positive**  
9 **regulation of EGFR signaling**

10

11

12

13

14

15

16

17

18 Minhee Kim<sup>\*</sup>, Olivia Y. Du<sup>\*</sup>, Rachael J. Whitney<sup>\*</sup>, Ronit Wilk<sup>†</sup>, Jack Hu<sup>†</sup>, Henry M.

19

Krause<sup>†</sup>, Joshua Kavalier<sup>‡</sup>, Bruce H. Reed<sup>\*¶</sup>

20

21

22

23

24

25

26

27

<sup>\*</sup>Department of Biology, University of Waterloo, Waterloo, ON, Canada N2L 3G1.

28

<sup>†</sup>Department of Molecular Genetics, The Terrence Donnelly Centre for Cellular and  
29 Biomolecular Research, University of Toronto, Toronto, ON, Canada, M5S 3E1

30

<sup>‡</sup>Department of Biology, Colby College, Waterville, ME, USA 04901

31

32

<sup>¶</sup>Author responsible for correspondence with journal:

33

Bruce H. Reed, Department of Biology, University of Waterloo, 200 University Avenue  
34 West, Waterloo, Ontario, Canada N2L 3G1. Phone: 519-888-4567 x38085, Fax: 519-  
35 746-0614

36

Email: [reed@uwaterloo.ca](mailto:reed@uwaterloo.ca)

37

38

Running title: *hindsight* promotes EGFR signaling

39

40

Key words: Hindsight/RREB-1, EGFR signaling, MAPK, germ band retraction

40

41 **Abstract**

42 We have investigated the relationship between the function of the gene *hindsight* (*hnt*),  
43 which is the Drosophila homolog of *Ras Responsive Element Binding protein-1* (*RREB-*  
44 *1*), and the EGFR signaling pathway. We report that *hnt* mutant embryos are defective in  
45 EGFR signaling dependent processes, namely chordotonal organ recruitment and  
46 oenocyte specification. We also show the temperature sensitive hypomorphic allele  
47 *hnt<sup>pebbled</sup>* is enhanced by the hypomorphic MAPK allele *rolled* (*rt<sup>l</sup>*). We find that *hnt*  
48 overexpression results in ectopic *DPax2* expression within the embryonic peripheral  
49 nervous system, and we show that this effect is EGFR-dependent. Finally, we show that  
50 the canonical U-shaped embryonic lethal phenotype of *hnt*, which is associated with  
51 premature degeneration of the extraembryonic amnioserosa and a failure in germ band  
52 retraction, is rescued by expression of several components of the EGFR signaling  
53 pathway (*sSpi*, *Ras85D<sup>V12</sup>*, *pnt<sup>P1</sup>*) as well as the caspase inhibitor *p35*. Based on this  
54 collection of corroborating evidence, we suggest that an overarching function of *hnt*  
55 involves the positive regulation of EGFR signaling.

56

57

58

59 **Introduction**

60

61 The gene *hindsight* (*hnt*), also known as *pebbled* (*peb*), was first identified in  
62 mutagenesis screens for embryonic lethal mutations performed in the early 1980's  
63 (WIESCHAUS *et al.* 1984). The embryonic lethal phenotype of *hnt* was categorized as “U-  
64 shaped”, reflecting a failure to undergo or complete germ band retraction. *hnt* has since  
65 been identified as the *Drosophila* homolog of mammalian *Ras Responsive Element*  
66 *Binding Protein -1* (*RREB-1*) (MELANI *et al.* 2008; MING *et al.* 2013), which strongly  
67 suggests a connection between *hnt* and the EGFR/Ras/MAPK signaling pathway  
68 (hereafter referred to as EGFR signaling). Interestingly, in *Drosophila*, *hnt* has been  
69 identified as a direct transcriptional target of the Notch signaling pathway (KREJCI *et al.*  
70 2009; TERRIENTE-FELIX *et al.* 2013). Mammalian *RREB-1*, on the other hand, has not  
71 been linked with Notch signaling but functions downstream of Ras/MAPK signaling and  
72 may either activate or repress certain Ras target genes (LIU *et al.* 2009; KENT *et al.* 2014).  
73 *RREB-1* has also been implicated in a number of human pathologies, including  
74 pancreatic, prostate, thyroid, and colon cancer (THIAGALINGAM *et al.* 1996;  
75 MUKHOPADHYAY *et al.* 2007; KENT *et al.* 2013; FRANKLIN *et al.* 2014).

76 The *hnt* gene encodes a transcription factor composed of 1893 amino acids  
77 containing 14 C<sub>2</sub>H<sub>2</sub>-type Zinc-fingers (YIP *et al.* 1997). Based on genetic interaction  
78 studies, Hnt's target genes are likely numerous and disparate with respect to function  
79 (WILK *et al.* 2004). Candidate direct target genes of Hnt identified using molecular  
80 methods include *hnt* itself, *nervy*, and *jitterbug* (MING *et al.* 2013; OLIVA *et al.* 2015).

81 The *nervy* gene encodes a *Drosophila* homolog of the human proto-oncogene

82 ETO/MTG8, while *jitterbug* encodes a conserved actin binding protein also known as  
83 *filamen*.

84 During development *hnt* is expressed in a broad range of tissues. In the embryo  
85 these include the amnioserosa (AS), anterior and posterior midgut primordia, the  
86 peripheral nervous system (PNS), the developing tracheal system, and the oenocytes (YIP  
87 *et al.* 1997; WILK *et al.* 2000; BRODU *et al.* 2004). During larval stages, in addition to the  
88 tracheal system, PNS, midgut, and oenocytes, *hnt* is expressed in the larval lymph gland,  
89 differentiated crystal cells, imaginal tracheoblasts, and the salivary glands of the third  
90 instar (PITSOULI AND PERRIMON 2010; MING *et al.* 2013; TERRIENTE-FELIX *et al.* 2013).  
91 In pupae, the sensory organ precursors (SOPs) of developing micro- and macrochaetae,  
92 as well as myoblasts, and all photoreceptor cells (R cells) of the developing retina express  
93 *hnt* (PICKUP *et al.* 2002; REEVES AND POSAKONY 2005; KREJCI *et al.* 2009; BUFFIN AND  
94 GHO 2010). In the adult, Hnt is expressed in the midgut (intestinal stem cells,  
95 enteroblasts, and enterocytes), developing egg chambers (follicle cells and the migratory  
96 border cells), spermathecae, and in mature neurons of the wing (SUN AND DENG 2007;  
97 MELANI *et al.* 2008; BAECHLER *et al.* 2015; SHEN AND SUN 2017; FARLEY *et al.* 2018).

98 While *hnt* is expressed in many different tissues, its expression within a given  
99 tissue can be dynamic. For example, in the adult intestinal stem cell lineage there is an  
100 increase of Hnt during enteroblast-to-enterocyte differentiation, but a decrease during  
101 enteroblast-to-enteroendocrine cell differentiation (BAECHLER *et al.* 2015). Hnt levels are  
102 particularly dynamic in the ovarian follicle cells, where Hnt is observed in stage 7-10A  
103 egg chambers as these cells initiate endoreduplication. A subset of follicle cells are  
104 subsequently devoid of Hnt through stages 10B to 13, and then display a strong increase



105 in stage 14 egg chambers prior to follicle cell rupture and an ovulation-like event (DEADY  
106 *et al.* 2017).

107         There is a wealth of information regarding *hnt* mutant phenotypes and *hnt*  
108 expression, yet a general definition of Hnt function remains elusive. Given that Hnt is  
109 the *Drosophila* homolog of RREB-1, we present an examination of *hnt* mutant  
110 phenotypes as well as *hnt* overexpression with specific attention to EGFR signaling.  
111 With respect to loss-of function analysis, we report two new findings that link *hnt* and  
112 EGFR signaling: first, *hnt* mutant embryos are defective in the processes of chordotonal  
113 organ recruitment as well as oenocyte specification, both of which are EGFR signaling-  
114 dependent processes (MAKKI *et al.* 2014); and second, we show that the temperature  
115 sensitive *hnt* allele *hnt<sup>pebbled</sup>* (*hnt<sup>peb</sup>*), which is associated with defective cone cell  
116 specification in the pupal retina (PICKUP *et al.* 2009), is enhanced by the hypomorphic  
117 MAPK allele *rolled* (*rl<sup>1</sup>*). In terms of *hnt* overexpression, we first show ectopic *DPax2*  
118 expression in embryos overexpressing *hnt*. We show similar ectopic *DPax2* expression  
119 in embryos in which EGFR signaling is abnormally increased through global expression  
120 of the active EGFR ligand *secreted Spitz* (*sSpi*). We subsequently demonstrate that *Egfr*  
121 loss-of-function mutants abrogate ectopic *DPax2* expression in the context of *hnt*  
122 overexpression. Last, we show that the U-shaped phenotype of *hnt* mutants, which  
123 involves premature degeneration of the AS and a failure in the morphogenetic process of  
124 germ band retraction (GBR) - which is also a phenotype displayed by *Egfr* mutants  
125 (CLIFFORD AND SCHUPBACH 1992) - can be rescued by expression of components of the  
126 EGFR signaling pathway (*sSpi*, *Ras85D<sup>V12</sup>*, *pnt<sup>P1</sup>*) as well as the caspase inhibitor *p35*.  
127 Interestingly, expression of the *pnt<sup>P2</sup>* isoform, which (unlike the *pnt<sup>P1</sup>* isoform) requires

128 activation by MAPK (O'NEILL *et al.* 1994; SHWARTZ *et al.* 2013), does not rescue *hnt*  
129 mutants. Given this collection of corroborating evidence, we suggest that a primary  
130 function of *hnt* involves the positive regulation of EGFR signaling.

131

## 132 **Materials and Methods**

### 133 ***Drosophila* stocks**

134 All cultures were raised on standard *Drosophila* medium at 25°C under a 12 hour  
135 light/dark cycle, unless otherwise indicated. The *hindsight* (*hnt*) alleles used were *hnt*<sup>XE81</sup>,  
136 *hnt*<sup>peb</sup> (YIP *et al.* 1997; WILK *et al.* 2004), and *hnt*<sup>NP7278ex1</sup> (this study). As previously  
137 described (YIP *et al.* 1997), *hnt*<sup>XE81</sup> is a strong hypomorphic embryonic lethal allele while  
138 *hnt*<sup>peb</sup> is a viable temperature sensitive hypomorphic allele associated with a rough eye  
139 phenotype at the restrictive temperature of 29° C. The *Egfr* mutant alleles used were  
140 *Egfr*<sup>1a15</sup> and *Egfr*<sup>l2</sup> as previously described (SHEN *et al.* 2013). The *rolled* (*rl*<sup>l</sup>) allele was  
141 provided by A. Hilliker. To drive ubiquitous expression throughout the early embryo we  
142 used *daGAL4* as previously described (REED *et al.* 2001). The *BO-GAL4* line was used  
143 to mark embryonic oenocytes (GUTIERREZ *et al.* 2007) and was provided by A. Gould.  
144 Overexpression of *hnt* used *UAS-GFP-hnt* as previously described (BAECHLER *et al.*  
145 2015). The adherens junctions marker *Ubi-DEcadherin-GFP* was used to outline cell  
146 membranes as previously described (CORMIER *et al.* 2012). The reporter gene  
147 *DPax2*<sup>B1</sup>*GFP* was as previously described (JOHNSON *et al.* 2011). *UAS-sSpi* was  
148 obtained from N. Harden. *pebBAC*<sup>CH321-46J02</sup> was obtained from M. Freeman. All other  
149 transgenes used originated from stocks obtained from the Bloomington *Drosophila* Stock  
150 Center (*UAS-CD8-GFP*, *UAS-GFP*<sup>nls</sup>, *UAS-p35*, *UAS-Ras85D*<sup>V12</sup>, *UAS-pnt*<sup>P1</sup>, *UAS-pnt*<sup>P2</sup>)

151 **Construction of *DPax2-dsRed* reporter lines**

152 The *DPax2<sup>B1</sup>dsRed* and *DPax2<sup>B2</sup>dsRed* reporter lines were generated by standard  
153 *P*-element transgenic methods (BACHMANN AND KNUST 2008) using the vector pRed H-  
154 Stinger (BAROLO *et al.* 2004) containing a previously described 3 KB *DPax2* enhancer  
155 (JOHNSON *et al.* 2011). Briefly, the 3 KB enhancer (position -3027 to +101 relative to the  
156 *DPax2* transcription start site) was excised from the Bam HI sites of a *DPax<sup>B</sup>*-pBluescript  
157 KS + plasmid. The insert was then cloned into the Bam HI site of pRed H-Stinger.

158 **Crossing schemes for analysis of *DPax2<sup>B2</sup>dsRed* expression in *Egfr* mutants, and**  
159 ***DPax2<sup>B1</sup>GFP* expression in embryos with elevated EGFR signaling.**

160 In order to analyze *DPax2* reporter construct expression in different backgrounds,  
161 the *Ubi-DEcadherin-GFP* (on *second* chromosome) was recombined with *Egfr<sup>1a15</sup>*, *UAS-*  
162 *GFP-hnt* (on *second* chromosome) was recombined with *Egfr<sup>f2</sup>*, *daGAL4* (on *third*  
163 chromosome) was recombined with *DPax2<sup>B2</sup>dsRed*, and *daGAL4* (on *third* chromosome)  
164 was recombined with *DPax2<sup>B1</sup>GFP* creating the following stocks:

165 **Stock 1:** *dp<sup>1a15</sup> Ubi-DEcadherin-GFP Egfr<sup>1a15</sup> / CyO*

166 **Stock 2:** *UAS-GFP-hnt Egfr<sup>f2</sup> / CyO*

167 **Stock 3:** *daGAL4 DPax2<sup>B2</sup>dsRed*

168 **Stock 4:** *daGAL4 DPax2<sup>B1</sup>GFP / TM6C*

169 To visualize *DPax2<sup>B2</sup>dsRed* expression in *Egfr<sup>1a15</sup>/Egfr<sup>f2</sup>* mutants, as well as  
170 *Egfr<sup>f2</sup>/+* heterozygotes, the following approach was used. Non-balancer male progeny of  
171 Stock 1 x Stock 3 ( *dp<sup>1a15</sup> Ubi-DE-cadherin Egfr<sup>1a15</sup>/+ ; daGAL4 DPax2<sup>B2</sup>dsRed/+*) were  
172 crossed to Stock 2. In embryos collected from this cross, *Egfr<sup>1a15</sup>/Egfr<sup>f2</sup>* mutants were  
173 recognized as embryos expressing *UAS-GFP-hnt*, *DPax2<sup>B2</sup>dsRed*, and *Ubi-DE-cadherin-*

174 *GFP*, while *Egfr<sup>f2</sup>/+* heterozygotes also expressed *UAS-GFP-hnt* and *DPax2<sup>B2</sup>dsRed*, but  
175 lacked *Ubi-DE-cadherin-GFP*.

176 To visualize *DPax2<sup>B1</sup>GFP* expression in embryos with elevated EGFR signaling,  
177 Stock 4 was crossed to homozygous *UAS-sSpi*.

### 178 **Immunostaining and Imaging**

179 Immunostaining of embryos was carried out as described (REED *et al.* 2001). The  
180 following primary antibodies were used at the indicated dilutions: mouse monoclonal  
181 anti-Hindsight (Hnt) 27B8 1G9 (1:25; from H. Lipshitz, University of Toronto), mouse  
182 monoclonal anti-22C10 (1:500; Developmental Studies Hybridoma Bank (DSHB)),  
183 mouse monoclonal anti- Armadillo (1:100; DSHB), and rabbit polyclonal anti-DPax2  
184 (1:2000; J. Kavalier, Colby College). The secondary antibodies used were: Alexa Fluor®  
185 488 goat anti-mouse and goat anti-rabbit (1:500; Cedarlane Labs), and TRITC goat anti-  
186 mouse (1:500; Cedarlane Labs). Staining embryos for f-actin using TRITC-phalloidin  
187 was performed as previously described (REED *et al.* 2001). Confocal microscopy and  
188 confocal image processing were performed as previously described (CORMIER *et al.*  
189 2012). Preparation of embryos for live imaging was as previously described (REED *et al.*  
190 2009).

### 191 **Fluorescent *in situ* hybridization (FISH)**

192 Whole mount fluorescent *in situ* hybridization used 3 hour embryo collections of  
193 wild-type or *daGAL4 > UAS-GFP-hnt* aged for 10 hours at 25° C, giving embryos at  
194 stage 13-16. Embryo fixation followed protocols as described (LECUYER *et al.* 2008).  
195 cDNA clones were acquired from the Drosophila Genomics Resource Center (Indiana  
196 University), including the *DPax2* clone IP01047.

## 197 **Cone cell distribution quantification**

198 48hr APF pupal eye discs were immunostained using anti-armadillo as described  
199 above in three genetic backgrounds (*rl*, *peb*, *rl peb*). *peb* is a temperature sensitive  
200 recessive visible allele and was reared under permissive (25° C) and restrictive (29° C)  
201 conditions. *rl* and *rl peb* lines were reared at 25° C. Five to six independent eye discs  
202 were examined for each genotype and condition (*rl* 25° C, *peb* 25° C, *peb* 29° C, and *rl*  
203 *peb* 25° C). The average frequencies of cone cell within an ommatidium, ranging from 1-  
204 5, were calculated with the standard deviation then plotted onto a stacked bar graph.

## 205 **Recovery of *hnt*<sup>NP7278ex1</sup>**

206 The viable and fertile *GAL4* enhancer trap line *NP7278*, inserted 158 bp upstream  
207 of the *hnt* transcription start site (THURMOND *et al.* 2019), was mobilized by crossing to  
208  $\Delta 2$ -3 transposase. Progeny were crossed to *FM7h*, *w B* and lines were established from  
209 single virgin females that had lost the *w*<sup>+</sup> marker of *NP7278*. Lethal lines (not producing  
210 *B*<sup>+</sup> progeny) were subsequently selected and tested for *GAL4* expression by crossing to  
211 *UAS-GFP<sup>nls</sup>*.

## 212 ***hnt*<sup>NP7278ex1</sup> rescue experiments**

213 The *hnt*<sup>NP7278ex1</sup> stock was crossed into a background carrying second  
214 chromosome insertions *UAS-GFP<sup>nls</sup>* and *Ubi-DE-cadherin-GFP*. Virgin females of this  
215 resulting stock (*y w hnt*<sup>NP7278ex1</sup> *FRT19A/FM7h*, *w*; *UAS-GFP<sup>nls</sup> Ubi-DE-cadherin-GFP/*  
216 *CyO*) were subsequently crossed to *tub-GAL80 hsFLP FRT19A* males (for control mutant)  
217 or to *tub-GAL80 hsFLP FRT19A; UAS-X* males for rescue experiments (where *UAS-X*  
218 was the homozygous 2<sup>nd</sup> chromosome insertion *UAS-p35*, or one of the homozygous 3<sup>rd</sup>  
219 chromosome insertions *UAS-sSpi*, *UAS-Ras85D<sup>v12</sup>*, or *UAS-pnt<sup>P1</sup>*). In the case of the 3<sup>rd</sup>

220 chromosome insertion *UAS-pnt<sup>P2</sup>*, which is not homozygous viable, male *tub-GAL80*  
221 *hsFLP FRT19A; UAS-pnt<sup>P2</sup> / UAS-Cherry<sup>nls</sup>* outcross progeny were used. Embryos  
222 between 12-14 hours old were collected from crosses of 30-40 females and males using  
223 an automated Drosophila egg collector (Flymax Scientific Ltd.) at room temperature  
224 (22°C) and mounted for live imaging as previously described (REED *et al.* 2009). For  
225 each imaging session, non-mutant embryos were confirmed as having completed or being  
226 in the terminal stages of dorsal closure. Mutant embryos (*hnt<sup>NP7278ex1</sup>/Y; UAS-GFP<sup>nls</sup>*  
227 *Ubi-DE-cadherin-GFP/UAS-X* or *hnt<sup>NP7278ex1</sup>/Y; UAS-GFP<sup>nls</sup> Ubi-DE-cadherin-GFP/+ ;*  
228 *UAS-X/+*) were unambiguously identified by expression of *UAS-GFP<sup>nls</sup>* (Fig. S3). In the  
229 case of *UAS-pnt<sup>P2</sup>*, mutant embryos also expressing *UAS-pnt<sup>P2</sup>* were identified as those  
230 embryos having *UAS-GFP<sup>nls</sup>* expression while lacking *UAS-Cherry<sup>nls</sup>* expression. A  
231 control rescue was performed by crossing to *y w hnt<sup>XE81</sup> FRT19A; pebBAC<sup>CH321-46J02</sup>*  
232 males (BAC insert is *hnt<sup>+</sup>*). Images of mutant embryos were scored as one of three  
233 possible categories: 1) GBR failure (telson pointed anteriorly) with a small AS remnant;  
234 2) GBR partial (telson pointed vertically or posteriorly but not at full posterior position)  
235 with an intact but distorted AS; 3) GBR complete (telson pointed posteriorly and located  
236 at normal posterior position) and with an intact but distorted or normal AS.

### 237 **Data and Reagent Availability**

238 Stocks used that are unique to this study are available upon request.  
239 Supplemental material has been uploaded to figshare. The image data sets and embryo  
240 scoring result used to evaluate *hnt<sup>NP7278ex1</sup>* rescue (presented in Fig. 5K) are available as  
241 supplemental material (Fig. S1). Other supplemental material includes the demonstration  
242 of reduced *hnt* expression in *hnt<sup>NP7278ex1</sup>* mutant embryos (Fig. S2) and Punnett square

243 diagrams detailing the genetic crosses used for the unambiguous identification of mutant  
244 and rescued *hnt*<sup>NP7278ex1</sup> mutant embryos (Fig. S3).

245

## 246 **Results**

### 247 **PNS, chordotonal organ and oenocyte specification are disrupted in *hnt* loss-of- 248 function mutants.**

249 In order to determine if phenotypes associated with reduced EGFR signaling are  
250 present in *hnt* mutants, we first examined the development of the PNS in *hnt*<sup>XE81</sup> mutant  
251 embryos using anti-Futsch/22C10 (hereafter referred to as 22C10), which labels all  
252 neurons of the PNS as well as some neurons of the central nervous system (CNS)  
253 (HUMMEL *et al.* 2000). *hnt*<sup>XE81</sup> mutant embryos lack sensory neurons (Fig. 1A, B). The  
254 absence of sensory neurons is most evident in the abdominal segments. Each embryonic  
255 abdominal hemisegment normally contains eight internal stretch receptors known as  
256 chordotonal organs, arranged as a single dorsal lateral organ (v'ch1), a lateral cluster of  
257 five (lch5), and two single ventral lateral organs (vchB, and vchA) (BREWSTER AND  
258 BODMER 1995). 22C10 immunostaining shows the neurons of the lch5 clusters are  
259 frequently reduced from five to three in number in *hnt*<sup>XE81</sup> mutants (asterisks, Fig. 1A, B  
260 and Fig. 1A', B'). TRITC-phalloidin staining of f-actin confirms the reduction of the  
261 lch5 clusters from five to three (asterisks, Fig. 1C and Fig. 1D), and reveals a complete  
262 absence of the single chordotonal organs in *hnt*<sup>XE81</sup> mutants (arrowheads in Fig. 1C).

263 In general, mutants lacking lateral chordotonal organs do not form oenocytes, and  
264 EGFR signaling has been implicated in oenocyte induction (ELSTOB *et al.* 2001). We,  
265 therefore, used the oenocyte specific *BO-GAL4* to drive expression of *nuclear-GFP* in

266 wild-type and *hnt*<sup>XE81</sup> mutants to evaluate oenocyte specification (Fig. 1E,F). In addition  
267 to *hnt* mutants having reduced numbers of *BO-GAL4*-positive cells, these cells are not  
268 organized into clusters as in wild-type, but are scattered throughout the mutant embryos.  
269 This newly reported phenotype of *hnt* mutants, that of missing chordotonal organs and a  
270 failure in oenocyte differentiation, is a hallmark of reduced EGFR signaling (MAKKI *et*  
271 *al.* 2014).

272

### 273 ***hnt*<sup>peb</sup> is enhanced by reduced MAPK**

274         Given the above findings, we were next interested in determining if a genetic  
275 background of reduced EGFR signaling would enhance a *hnt* mutant phenotype. Using  
276 anti-Armadillo (Arm) immunostaining, we evaluated the pupal ommatidial structure of  
277 the temperature sensitive hypomorphic *hnt* allele *pebbled* (*hnt*<sup>peb</sup>) as well as a viable  
278 hypomorphic mutant of the EGFR downstream effector MAPK, also known as *rolled*  
279 (*rl*<sup>l</sup>). At the permissive temperature of 25°C, 87% of ommatidia in *hnt*<sup>peb</sup> mutants  
280 resemble wild-type and contain four cone cells (Fig. 2A,B *cf.* 2C; Fig. 2G). Likewise,  
281 90% of ommatidia of *rl*<sup>l</sup> mutants raised at 25°C are normal (Fig. 2D,G). The number of  
282 ommatidia showing a normal cone cell number is reduced to 28% in *peb* mutants raised  
283 at the restrictive temperature of 29°C (Fig. 2E,G) while *peb*; *rl*<sup>l</sup> double mutants raised at  
284 the permissive temperature (25°C) display a distinct enhancement of the *peb* mutant  
285 phenotype, having only 22% of ommatidia with the correct cone cell number (Fig. 2F,G).  
286 These observations demonstrate a novel genetic interaction between *hnt* and *MAPK*,  
287 showing that *rl*<sup>l</sup> behaves as an enhancer of the cone cell specification defect of *hnt*<sup>peb</sup>.  
288 Interestingly, *hnt* is not expressed in cone cells, but is expressed in photoreceptor



289 precursor cells (R cells) where it is required for induction and expression within cone  
290 cells of the determinant *DPax2* (PICKUP *et al.* 2009).

291

### 292 **Overexpression of *hnt* during embryogenesis results in ectopic *DPax2* expression**

293 Using a candidate gene approach, we examined stage 13-16 embryos in which  
294 *UAS-GFP-hnt* was globally expressed using the *daGAL4* driver. Among candidate genes  
295 tested, *DPax2* (*CG11049*, also known as *shaven* (*sv*) or *sparkling* (*spa*)) was found to  
296 show a striking transcriptional upregulation in embryos overexpressing *hnt* compared to  
297 control embryos (Fig. 3A,B). The upregulation of *DPax2* in embryos overexpressing *hnt*  
298 was confirmed at the level of protein expression by anti-*DPax2* immunostaining (Fig.  
299 3C,D) as well as by reporter gene construct expression (Fig. 3E,F). Interestingly, *hnt*  
300 mutants do not abolish or reduce *DPax2* expression (Fig. 3G), suggesting that while *hnt*  
301 overexpression can result in *DPax2* overexpression, *Hnt* is not required for endogenous  
302 *DPax2* expression throughout the embryonic PNS.

303

### 304 **Ectopic *DPax2* expression in the context of *hnt* overexpression is EGFR dependent.**

305 *DPax2* encodes a paired domain transcription factor and is expressed in the  
306 developing PNS, including the embryonic PNS, pupal eye, and micro- and macrochaetes  
307 (FU *et al.* 1998). We next wished to determine if *DPax2* expression in embryos  
308 overexpressing *hnt* is dependent on EGFR signaling. Compared to the overexpression  
309 control (Fig. 4A-A''), we found that reduced EGFR (*Egfr<sup>la15</sup>/Egfr<sup>f2</sup>*) suppresses ectopic  
310 *DPax2* expression (Fig. 4B-B''). We also observed that *DPax2* overexpression  
311 associated with *hnt* overexpression is sensitive to *Egfr* dosage as *Egfr<sup>f2</sup>/+* heterozygous

312 embryos show reduced *DPax2* expression relative to the overexpression control (Fig. 4C-  
313 C''). To further corroborate *DPax2* ectopic expression as EGFR-dependent, we  
314 examined *DPax2* reporter gene expression in embryos globally expressing the activated  
315 EGFR ligand *secreted Spitz (sSpi)*. Such embryos also show ectopic *DPax2* expression,  
316 suggesting that ectopic *DPax2* expression is elicited through increased EGFR signaling  
317 (Fig. 4 D,E). In addition, we found that the same *Egfr* mutant (*Egfr<sup>la15</sup>/Egfr<sup>l2</sup>*) does show  
318 expression of the *DPax2<sup>B2</sup>dsRed* reporter. Although the total number of *DPax2*  
319 expressing cells is reduced relative to wildtype, this indicates that *Egfr* mutants are  
320 capable of producing cells that express *DPax2* (Fig. 4F). Taken together, these data are  
321 consistent with the interpretation that *DPax2* is not a direct target of *hnt*, that ectopic  
322 *DPax2* expression is a consequence of excessive EGFR signaling, and that *hnt*  
323 overexpression may result in *DPax2* overexpression through excessive EGFR signaling.  
324 Moreover, these results raise the possibility that *hnt* loss-of-function mutants could  
325 possibly be rescued by ectopic activation of Egfr signaling.

326

327 **The embryonic U-shaped terminal mutant phenotype of *hnt<sup>NP7278ex1</sup>* is rescued by**  
328 **activation of EGFR signaling**

329       Given the above results showing phenotypes related to reduced EGFR signaling  
330 in *hnt* mutants, the genetic enhancement between *hnt<sup>peb</sup>* and *rl<sup>l</sup>*, in addition to the EGFR-  
331 dependence of ectopic *DPax2* expression associated with *hnt* overexpression, we wished  
332 to test if *hnt* loss-of-function phenotypes can be rescued by activation of Egfr signaling.  
333 As is the case for *Egfr* mutants, *hnt* mutants fail to undergo or complete GBR and are  
334 associated with premature AS degeneration and death (FRANK AND RUSHLOW 1996;

335 GOLDMAN-LEVI *et al.* 1996; LAMKA AND LIPSHITZ 1999). We conducted rescue  
336 experiments using a newly recovered *hnt* allele, *hnt*<sup>NP7278ex1</sup> (see Materials and Methods).  
337 The *hnt*<sup>NP7278ex1</sup> allele is a *GAL4* enhancer trap insertion that is embryonic lethal, fails to  
338 complement *hnt*<sup>XE81</sup>, shows premature AS degeneration, has GBR defects (Fig. 5D,E,K),  
339 and is rescued by *pebBAC*<sup>CH321-46J02</sup> (Fig. 5F, K). Very similar to the previously  
340 described allele *hnt*<sup>308</sup> (REED *et al.* 2001), *hnt*<sup>NP7278ex1</sup> shows reduced anti-Hnt  
341 immunostaining (Fig. S2). *hnt*<sup>NP7278ex1</sup> is, therefore, best characterized as a strong  
342 hypomorphic allele. Interestingly, the *hnt*<sup>NP7278ex1</sup> mutant retains *GAL4* expression in a  
343 pattern faithful to endogenous *hnt* expression, including early (prior to onset of GBR)  
344 expression in the AS (Fig 5A,B). The *hnt*<sup>NP7278ex1</sup> mutant phenotype, however, does not  
345 disrupt oenocyte specification or the *lch5* cluster of chordotonal organs as we described  
346 for *hnt*<sup>XE81</sup>. We, therefore, chose to test for rescue of premature AS death and GBR  
347 failure. We were able to use *hnt*<sup>NP7278ex1</sup> in combination with an *X*-linked *tub-GAL80*  
348 insertion to unambiguously identify hemizygous *hnt*<sup>NP7278ex1</sup> mutant embryos that also  
349 express an autosomal UAS transgene (see Materials and Methods, and Fig. S3). We  
350 found that 72.4% (n=58) of control *hnt*<sup>NP7278ex1</sup> embryos show a strong U-shaped  
351 phenotype in which the AS is reduced to a small remnant, indicative of GBR failure and  
352 premature AS degeneration, respectively (Fig. 5E,K). The AS degeneration and GBR  
353 phenotype of *hnt*<sup>NP7278ex1</sup> mutants was rescued by expression of the baculovirus caspase  
354 inhibitor *UAS-p35* (5.9% GBR failure; n= 34; Fig. 5F,I), the activated EGFR ligand *UAS-*  
355 *sSpi* (0% GBR failure; n = 27, Fig. 5H,K), constitutively active RAS (8.3% GBR failure;  
356 n= 36; Fig. 5I,K). We also tested for rescue of *hnt*<sup>NP7278ex1</sup> by expression of two isoforms  
357 of the ETS transcription factor effector encoded by *pointed* (*pnt*), which is a downstream

358 effector of the EGFR/Ras/MAPK pathway. The isoform Pnt<sup>P2</sup> requires activation  
359 through phosphorylation by MAPK, whereas the Pnt<sup>P1</sup> isoform, which is transcriptionally  
360 activated by the activated form of Pnt<sup>P2</sup>, is constitutively active without activation by  
361 MAPK (O'NEILL *et al.* 1994; SHWARTZ *et al.* 2013). Expression of the constitutively  
362 active isoform via *UAS-Pnt<sup>P1</sup>* resulted in rescue (9.1% GBR failure; n= 31; Fig.5J,K).  
363 Interestingly, expression the other isoform via *UAS-Pnt<sup>P2</sup>* did not rescue *hnt<sup>NP7278ex1</sup>*  
364 (72.0% GBR failure, n= 25; Fig. 5K). All image data sets and scoring annotations used  
365 to generate Fig. 5K are presented as supplemental material (Fig. S1). Rescue by *UAS-*  
366 *p35* confirms that premature AS degeneration in *hnt* mutants is associated with caspase  
367 activation. Furthermore, rescue of *hnt* mutants by expression of components of the  
368 EGFR signaling pathway is consistent with *hnt* operating either upstream or in parallel to  
369 this pathway. Rescue was not complete in that AS morphology was abnormal, and  
370 rescued embryos failed to complete dorsal closure likely due to the abnormal persistence  
371 of the rescued AS. Interestingly, the failure to rescue AS death and GBR defects by  
372 expression of the *Pnt<sup>P2</sup>* isoform, which requires activation through phosphorylation by  
373 MAPK (O'NEILL *et al.* 1994; SHWARTZ *et al.* 2013), is consistent with reduced MAPK  
374 activity within the AS of *hnt* mutants.

375  
376  
377

## Discussion

378 ***hnt* loss-of-function and *hnt* overexpression phenotypes are consistent with**  
379 **perturbations in EGFR signaling.**

380 The development of chordotonal organs and oenocyte specification are both  
381 disrupted in *hnt* mutants and these phenotypes are hallmarks of reduced EGFR signaling.

382 As an overview, each embryonic abdominal hemisegment normally develops eight  
383 chordotonal organs, organized into three single organs (*v'ch1*, *vchB*, and *vchA*), and a  
384 cluster of five organs (*lch5*). The embryonic specification and differentiation of  
385 chordotonal organs initiates with the delamination of chordotonal precursor cells (COPs)  
386 from the ectoderm (reviewed in (GOULD *et al.* 2001)). Briefly, chordotonal organs arise  
387 from five primary COPs (C1-C5), where C1-C3 give rise to the five organs of *lch5*, C4 is  
388 a precursor of *v'ch1*, and C5 is the precursor for *vchB* and *vchA*. The secretion of the  
389 active EGFR ligand Spitz by C3 and C5 expands the number of COPs from five to eight.  
390 Further EGFR signaling elicited by the C1 COP is also required for the induction of  
391 oenocytes (reviewed in (MAKKI *et al.* 2014)). In the absence of *Egfr* signaling, C1 fails  
392 to recruit oenocytes, and C3 fails to recruit secondary COPs to complete the five lateral  
393 chordotonal organs of the *lch5* cluster (GOULD *et al.* 2001). Mutant phenotypes of genes  
394 belonging to what has been called the Spitz group (which encode components of the  
395 EGFR signaling pathway and include *Star*, *rhuboid*, *spitz*, and *pointed*), as well as the  
396 expression of dominant-negative EGFR, all display an absence of oenocytes and the  
397 formation of only three lateral chordotonal organs within the *lch5* cluster (BIER *et al.*  
398 1990; ELSTOB *et al.* 2001; RUSTEN *et al.* 2001). Based on our analysis of *hnt* mutant  
399 embryos, we suggest that *hnt* can be aptly described as a previously unrecognized  
400 member of the Spitz group of mutants. Overall, however, our findings represent  
401 additions to the list of phenotypic similarities between *hnt* and *Egfr* mutants, including  
402 germ band retraction and dorsal closure failure, as well as the loss of tracheal epithelial  
403 integrity (CLIFFORD AND SCHUPBACH 1992; CELA AND LLIMARGAS 2006; SHEN *et al.*  
404 2013).

405 We found *hnt* overexpression in the embryo results in increased and ectopic  
406 expression of *DPax2*, and we found this effect to be unequivocally Egfr-dependent. We  
407 also found that global activation of Egfr signaling via expression of the Egfr ligand *sSpi*  
408 also causes *DPax2* overexpression. Our results are consistent with previous work  
409 showing that Hnt is required in the developing eye imaginal disc for cone cell induction;  
410 here, it was also shown that reduced *hnt* expression resulted in reduced *DPax2*, that *hnt*  
411 overexpression resulted in increased *DPax2*, and that these effects were non-autonomous  
412 (PICKUP *et al.* 2009). The suggested model was that Hnt is required within the R1/R6  
413 photoreceptor precursor cells to achieve a level of Delta sufficient for cone cell induction.  
414 While our suggestion that Hnt promotes Egfr signaling is not mutually exclusive with a  
415 role in promoting *Delta* expression, it is noteworthy that the expression of *Delta* within  
416 R-precursor cells is elevated by the activation of EGFR signaling in these cells (TSUDA *et*  
417 *al.* 2006). The observation of reduced Delta associated with reduced *hnt* expression  
418 could, therefore, be attributed to reduced Hnt-dependent EGFR signaling within the R-  
419 precursor cells.

420

#### 421 **Rescue of the *hnt* U-shaped mutant phenotype**

422 The AS, which is programmed to die during and following the process of dorsal  
423 closure, is possibly required for mechanical as well as signaling events that are critical for  
424 the morphogenetic processes of GBR and dorsal closure. Premature AS death may,  
425 therefore, lead to U-shaped or dorsal closure phenotypes. In support of this view, AS-  
426 specific cell ablation disrupts dorsal closure (SCUDERI AND LETSOU 2005), and other U-  
427 shaped mutants display premature AS death, including *u-shaped (ush)*, *tail-up (tup)*,

428 *serpent* (*srp*), and *mysospheroid* (*mys*) (FRANK AND RUSHLOW 1996; GOLDMAN-LEVI *et al.*  
429 1996; REED *et al.* 2004).

430 AS programmed cell death normally occurs through an upregulation of autophagy  
431 in combination with caspase activation (MOHSENI *et al.* 2009; CORMIER *et al.* 2012). AS  
432 death can be prevented, resulting in a persistent AS phenotype, in a number of  
433 backgrounds. These include expression of the caspase inhibitor *p35*, RNAi knockdown  
434 of the proapoptotic gene *hid*, expression of activated Insulin receptor (*dInR<sup>ACT</sup>*), dominant  
435 negative ecdysone receptor (*EcR<sup>DN</sup>*), active EGFR ligand *secreted Spitz* (*sSpi*),  
436 constitutively active RAS (*Ras85D<sup>V12</sup>*), as well as over expression of *Egfr-GFP*  
437 (MOHSENI *et al.* 2009; SHEN *et al.* 2013). In addition, embryos homozygous for  
438 *Df(3L)H99*, which deletes the pro-apoptotic gene cluster *reaper/hid/grim*, also present a  
439 persistent AS phenotype (MOHSENI *et al.* 2009; CORMIER *et al.* 2012). During normal  
440 development, Hnt is no longer detectable by immunostaining within the AS as it begins  
441 to degenerate following dorsal closure (REED *et al.* 2004; MOHSENI *et al.* 2009). Thus, it  
442 is likely that *hnt* downregulation is required for normal AS degeneration, and that the  
443 mutant phenotype of *hnt* is the result of a premature activation of the normal death  
444 process. In support of this, we have demonstrated that several backgrounds associated  
445 with a persistent AS phenotype are able to rescue GBR failure and AS death in *hnt*  
446 mutants.

447 In the context of programmed cell death within the embryonic CNS, MAPK  
448 dependent phosphorylation has been show to inhibit the pro-apoptotic activity of the Hid  
449 protein (BERGMANN *et al.* 2002). We suggest that *Egfr* signaling within the AS could  
450 also represent a survival signal, leading to MAPK activation and Hid inhibition. Several

451 observations are consistent with this model, including AS expression of several  
452 components of the Egfr signaling pathway. For example, within the AS anlage there is  
453 robust expression of *rhomboid* (*rho*) (FRANCOIS *et al.* 1994), which encodes a  
454 intramembrane serine protease required for the activation of EGFR ligands; see (SHILO  
455 2005). In addition, prior to the onset of GBR, there is pronounced AS expression of *vein*  
456 (*vn*), which encodes an additional EGFR ligand (SCHNEPP *et al.* 1996). Vein is a weaker  
457 EGFR ligand, but it is produced in an active form and is not subject to inhibition by the  
458 EGFR antagonist Argos (Aos); see (GOLEMBO *et al.* 1999; SHILO 2005). At about the  
459 same stage, expression of a downstream EGFR effector *pointed* (*pnt*) is found in the AS,  
460 as is *hid*, which is also expressed in the apoptotic AS (see Berkeley Drosophila Genome  
461 Project; <https://insitu.fruitfly.org/cgi-bin/ex/insitu.pl>).

462

### 463 **Potential Hnt target genes and EGFR signaling**

464 As a model for normal AS death, we suggest that a downregulation of *hnt*  
465 expression could lead to reduced EGFR AS signaling, thereby decreasing MAPK  
466 inhibitory phosphorylation of the pro-apoptotic protein Hid. According to this model, AS  
467 death and subsequent GBR failure in *hnt* mutants would be attributed to reduced EGFR  
468 signaling, lower MAPK activity, and pro-apoptotic activity of unphosphorylated Hid.  
469 But how might *hnt* expression promote Egfr signaling and maintain high MAPK activity?

470 A recent genetic screen for genes involved in the regulation of Wallerian  
471 degeneration (the fragmentation and clearance of severed axons) identified *hnt* as being  
472 required for this process. As part of this work, the authors performed ChIP-seq analysis  
473 of a *GM2* Drosophila cell line expressing a tagged version of Hnt. This resulted in the



474 identification of 80 potential direct targets of Hnt (FARLEY *et al.* 2018). Interestingly,  
475 several of these putative Hnt target genes are also known targets of the EGFR signaling  
476 pathway, including *InR* (ZHANG *et al.* 2011), *E2f1* (XIANG *et al.* 2017), *bantam*  
477 (HERRANZ *et al.* 2012), *Dl* (TSUDA *et al.* 2002), and *dve* (SHIRAI *et al.* 2003); while others  
478 have been implicated in the regulation of EGFR signaling and include *EcR* (QIAN *et al.*  
479 2014), *srp* (CAMPBELL *et al.* 2018), *MESR6* (HUANG AND RUBIN 2000), *Madm* (SINGH *et*  
480 *al.* 2016), and *skd* (LIM *et al.* 2007). Also, and of particular interest, among the genes  
481 identified are known target genes of EGFR signaling that are also regulators or effectors  
482 of EGFR signaling. These include the gene *pnt*, which encodes an ETS transcriptional  
483 activator - a key component for the transcriptional output of EGFR signaling that can also  
484 create a positive feedback loop through the transcription of *vn* (GOLEMBO *et al.* 1999;  
485 PAUL *et al.* 2013; CRUZ *et al.* 2015), and *Mkp3* (*Mitogen-activated protein kinase*), which  
486 is a negative regulator of EGFR signaling (GABAY *et al.* 1996; KIM *et al.* 2004; BUTCHAR  
487 *et al.* 2012). Further investigations will be required to determine if the phenotypes  
488 associated with *hnt* overexpression, as well as *hnt* loss-of-function, can be attributable (in  
489 whole or in part) to changes in expression of any of these potential target genes.

490

491

492 **Acknowledgements**

493 We thank the Bloomington Drosophila Resource Center (BDRC) and the Kyoto  
494 Drosophila Resource Center for genetic stocks. We are grateful to M. Freeman, A.  
495 Gould, N. Harden, A. Hilliker, and H. Lipshitz for additional stocks and reagents. We  
496 also thank the Developmental Studies Hybridoma Bank (DSHB), created by the NICHD  
497 of the NIH and maintained at The University of Iowa, Department of Biology, Iowa City,  
498 IA 52242. We thank the Drosophila Genomics Resource Center (Indiana University).  
499 H.M.K. was supported by the Canadian Institute of Health Research (MOP 133473) and  
500 B.H.R. was supported by the Natural Sciences and Engineering Research Council of  
501 Canada (NSERC RGPIN-2015-04458).

502

503 **References**

504 Bachmann, A., and E. Knust, 2008 The use of P-element transposons to generate  
505 transgenic flies. *Methods Mol Biol* 420: 61-77.

506 Baechler, B. L., C. McKnight, P. C. Pruchnicki, N. A. Biro and B. H. Reed, 2015  
507 Hindsight/RREB-1 functions in both the specification and differentiation of stem cells in  
508 the adult midgut of *Drosophila*. *Biology Open*.

509 Barolo, S., B. Castro and J. W. Posakony, 2004 New *Drosophila* transgenic reporters:  
510 insulated P-element vectors expressing fast-maturing RFP. *Biotechniques* 36: 436-440,  
511 442.

512 Bergmann, A., M. Tugentman, B. Z. Shilo and H. Steller, 2002 Regulation of cell number  
513 by MAPK-dependent control of apoptosis: a mechanism for trophic survival signaling.  
514 *Dev Cell* 2: 159-170.

515 Bier, E., L. Y. Jan and Y. N. Jan, 1990 rhomboid, a gene required for dorsoventral axis  
516 establishment and peripheral nervous system development in *Drosophila melanogaster*.  
517 *Genes Dev* 4: 190-203.

518 Brewster, R., and R. Bodmer, 1995 Origin and specification of type II sensory neurons in  
519 *Drosophila*. *Development* 121: 2923-2936.

520 Brodu, V., P. R. Elstob and A. P. Gould, 2004 EGF receptor signaling regulates pulses of  
521 cell delamination from the *Drosophila* ectoderm. *Dev Cell* 7: 885-895.

522 Buffin, E., and M. Gho, 2010 Laser microdissection of sensory organ precursor cells of  
523 *Drosophila* microchaetes. *PLoS One* 5: e9285.

524 Butchar, J. P., D. Cain, S. N. Manivannan, A. D. McCue, L. Bonanno *et al.*, 2012 New  
525 negative feedback regulators of Egfr signaling in *Drosophila*. *Genetics* 191: 1213-1226.

526 Campbell, K., G. Lebreton, X. Franch-Marro and J. Casanova, 2018 Differential roles of  
527 the *Drosophila* EMT-inducing transcription factors Snail and Serpent in driving primary  
528 tumour growth. *PLoS Genet* 14: e1007167.

529 Cela, C., and M. Llimargas, 2006 Egfr is essential for maintaining epithelial integrity  
530 during tracheal remodelling in *Drosophila*. *Development* 133: 3115-3125.

531 Clifford, R., and T. Schupbach, 1992 The torpedo (DER) receptor tyrosine kinase is  
532 required at multiple times during *Drosophila* embryogenesis. *Development* 115: 853-872.

533 Cormier, O., N. Mohseni, I. Voytyuk and B. H. Reed, 2012 Autophagy can promote but  
534 is not required for epithelial cell extrusion in the amnioserosa of the *Drosophila* embryo.  
535 *Autophagy* 8: 252-264.

536 Cruz, J., N. Bota-Rabassedas and X. Franch-Marro, 2015 FGF coordinates air sac  
537 development by activation of the EGF ligand Vein through the transcription factor PntP2.  
538 Sci Rep 5: 17806.

539 Deady, L. D., W. Li and J. Sun, 2017 The zinc-finger transcription factor Hindsight  
540 regulates ovulation competency of *Drosophila* follicles. Elife 6.

541 Elstob, P. R., V. Brodu and A. P. Gould, 2001 spalt-dependent switching between two  
542 cell fates that are induced by the *Drosophila* EGF receptor. Development 128: 723-732.

543 Farley, J. E., T. C. Burdett, R. Barria, L. J. Neukomm, K. P. Kenna *et al.*, 2018  
544 Transcription factor Pebbled/RREB1 regulates injury-induced axon degeneration. Proc  
545 Natl Acad Sci U S A 115: 1358-1363.

546 Francois, V., M. Solloway, J. W. O'Neill, J. Emery and E. Bier, 1994 Dorsal-ventral  
547 patterning of the *Drosophila* embryo depends on a putative negative growth factor  
548 encoded by the short gastrulation gene. Genes Dev 8: 2602-2616.

549 Frank, L. H., and C. Rushlow, 1996 A group of genes required for maintenance of the  
550 amnioserosa tissue in *Drosophila*. Development 122: 1343-1352.

551 Franklin, R. B., J. Zou and L. C. Costello, 2014 The cytotoxic role of RREB1, ZIP3 zinc  
552 transporter, and zinc in human pancreatic adenocarcinoma. Cancer Biol Ther 15: 1431-  
553 1437.

554 Fu, W., H. Duan, E. Frei and M. Noll, 1998 shaven and sparkling are mutations in  
555 separate enhancers of the *Drosophila* Pax2 homolog. Development 125: 2943-2950.

556 Gabay, L., H. Scholz, M. Golembo, A. Klaes, B. Z. Shilo *et al.*, 1996 EGF receptor  
557 signaling induces pointed P1 transcription and inactivates Yan protein in the *Drosophila*  
558 embryonic ventral ectoderm. Development 122: 3355-3362.

559 Goldman-Levi, R., C. Miller, G. Greenberg, E. Gabai and N. B. Zak, 1996 Cellular  
560 pathways acting along the germband and in the amnioserosa may participate in germband  
561 retraction of the *Drosophila melanogaster* embryo. *Int J Dev Biol* 40: 1043-1051.

562 Golembo, M., T. Yarnitzky, T. Volk and B. Z. Shilo, 1999 Vein expression is induced by  
563 the EGF receptor pathway to provide a positive feedback loop in patterning the  
564 *Drosophila* embryonic ventral ectoderm. *Genes Dev* 13: 158-162.

565 Gould, A. P., P. R. Elstob and V. Brodu, 2001 Insect oenocytes: a model system for  
566 studying cell-fate specification by Hox genes. *J Anat* 199: 25-33.

567 Gutierrez, E., D. Wiggins, B. Fielding and A. P. Gould, 2007 Specialized hepatocyte-like  
568 cells regulate *Drosophila* lipid metabolism. *Nature* 445: 275-280.

569 Herranz, H., X. Hong and S. M. Cohen, 2012 Mutual repression by bantam miRNA and  
570 Capicua links the EGFR/MAPK and Hippo pathways in growth control. *Curr Biol* 22:  
571 651-657.

572 Huang, A. M., and G. M. Rubin, 2000 A misexpression screen identifies genes that can  
573 modulate RAS1 pathway signaling in *Drosophila melanogaster*. *Genetics* 156: 1219-  
574 1230.

575 Hummel, T., K. Krukkert, J. Roos, G. Davis and C. Klambt, 2000 *Drosophila*  
576 Futsch/22C10 is a MAP1B-like protein required for dendritic and axonal development.  
577 *Neuron* 26: 357-370.

578 Johnson, S. A., K. J. Harmon, S. G. Smiley, F. M. Still and J. Kavalier, 2011 Discrete  
579 regulatory regions control early and late expression of D-Pax2 during external sensory  
580 organ development. *Dev Dyn* 240: 1769-1778.

581 Kent, O. A., K. Fox-Talbot and M. K. Halushka, 2013 RREB1 repressed miR-143/145  
582 modulates KRAS signaling through downregulation of multiple targets. *Oncogene* 32:  
583 2576-2585.

584 Kent, O. A., M. N. McCall, T. C. Cornish and M. K. Halushka, 2014 Lessons from miR-  
585 143/145: the importance of cell-type localization of miRNAs. *Nucleic Acids Res* 42:  
586 7528-7538.

587 Kim, M., G. H. Cha, S. Kim, J. H. Lee, J. Park *et al.*, 2004 MKP-3 has essential roles as a  
588 negative regulator of the Ras/mitogen-activated protein kinase pathway during  
589 *Drosophila* development. *Mol Cell Biol* 24: 573-583.

590 Krejci, A., F. Bernard, B. E. Housden, S. Collins and S. J. Bray, 2009 Direct response to  
591 Notch activation: signaling crosstalk and incoherent logic. *Sci Signal* 2: ra1.

592 Lamka, M. L., and H. D. Lipshitz, 1999 Role of the amnioserosa in germ band retraction  
593 of the *Drosophila melanogaster* embryo. *Dev Biol* 214: 102-112.

594 Lecuyer, E., A. S. Necakov, L. Caceres and H. M. Krause, 2008 High-resolution  
595 fluorescent in situ hybridization of *Drosophila* embryos and tissues. *CSH Protoc* 2008:  
596 pdb prot5019.

597 Lim, J., O. K. Lee, Y. C. Hsu, A. Singh and K. W. Choi, 2007 *Drosophila* TRAP230/240  
598 are essential coactivators for Atonal in retinal neurogenesis. *Dev Biol* 308: 322-330.

599 Liu, H., H. C. Hew, Z. G. Lu, T. Yamaguchi, Y. Miki *et al.*, 2009 DNA damage  
600 signalling recruits RREB-1 to the p53 tumour suppressor promoter. *Biochem J* 422: 543-  
601 551.

602 Makki, R., E. Cinnamon and A. P. Gould, 2014 The development and functions of  
603 oenocytes. *Annu Rev Entomol* 59: 405-425.

604 Melani, M., K. J. Simpson, J. S. Brugge and D. Montell, 2008 Regulation of cell  
605 adhesion and collective cell migration by hindsight and its human homolog RREB1. *Curr*  
606 *Biol* 18: 532-537.

607 Ming, L., R. Wilk, B. H. Reed and H. D. Lipshitz, 2013 *Drosophila* Hindsight and  
608 mammalian RREB-1 are evolutionarily conserved DNA-binding transcriptional  
609 attenuators. *Differentiation* 86: 159-170.

610 Mohseni, N., S. C. McMillan, R. Chaudhary, J. Mok and B. H. Reed, 2009 Autophagy  
611 promotes caspase-dependent cell death during *Drosophila* development. *Autophagy* 5:  
612 329-338.

613 Mukhopadhyay, N. K., B. Cinar, L. Mukhopadhyay, M. Lutchman, A. S. Ferdinand *et*  
614 *al.*, 2007 The zinc finger protein ras-responsive element binding protein-1 is a  
615 coregulator of the androgen receptor: implications for the role of the Ras pathway in  
616 enhancing androgenic signaling in prostate cancer. *Mol Endocrinol* 21: 2056-2070.

617 O'Neill, E. M., I. Rebay, R. Tjian and G. M. Rubin, 1994 The activities of two Ets-related  
618 transcription factors required for *Drosophila* eye development are modulated by the  
619 Ras/MAPK pathway. *Cell* 78: 137-147.

620 Oliva, C., C. Molina-Fernandez, M. Maureira, N. Candia, E. Lopez *et al.*, 2015 Hindsight  
621 regulates photoreceptor axon targeting through transcriptional control of jitterbug/Filamin  
622 and multiple genes involved in axon guidance in *Drosophila*. *Dev Neurobiol.*

623 Paul, L., S. H. Wang, S. N. Manivannan, L. Bonanno, S. Lewis *et al.*, 2013 Dpp-induced  
624 Egfr signaling triggers postembryonic wing development in *Drosophila*. *Proc Natl Acad*  
625 *Sci U S A* 110: 5058-5063.

626 Pickup, A. T., M. L. Lamka, Q. Sun, M. L. Yip and H. D. Lipshitz, 2002 Control of  
627 photoreceptor cell morphology, planar polarity and epithelial integrity during *Drosophila*  
628 eye development. *Development* 129: 2247-2258.

629 Pickup, A. T., L. Ming and H. D. Lipshitz, 2009 Hindsight modulates Delta expression  
630 during *Drosophila* cone cell induction. *Development* 136: 975-982.

631 Pitsouli, C., and N. Perrimon, 2010 Embryonic multipotent progenitors remodel the  
632 *Drosophila* airways during metamorphosis. *Development* 137: 3615-3624.

633 Qian, Y., N. Dominado, R. Zoller, C. Ng, K. Kudyba *et al.*, 2014 Ecdysone signaling  
634 opposes epidermal growth factor signaling in regulating cyst differentiation in the male  
635 gonad of *Drosophila melanogaster*. *Dev Biol* 394: 217-227.

636 Reed, B. H., S. C. McMillan and R. Chaudhary, 2009 The preparation of *Drosophila*  
637 embryos for live-imaging using the hanging drop protocol. *J Vis Exp*.

638 Reed, B. H., R. Wilk and H. D. Lipshitz, 2001 Downregulation of Jun kinase signaling in  
639 the amnioserosa is essential for dorsal closure of the *Drosophila* embryo. *Curr Biol* 11:  
640 1098-1108.

641 Reed, B. H., R. Wilk, F. Schock and H. D. Lipshitz, 2004 Integrin-dependent apposition  
642 of *Drosophila* extraembryonic membranes promotes morphogenesis and prevents anoikis.  
643 *Curr Biol* 14: 372-380.

644 Reeves, N., and J. W. Posakony, 2005 Genetic programs activated by proneural proteins  
645 in the developing *Drosophila* PNS. *Dev Cell* 8: 413-425.

646 Rusten, T. E., R. Cantera, J. Urban, G. Technau, F. C. Kafatos *et al.*, 2001 Spalt modifies  
647 EGFR-mediated induction of chordotonal precursors in the embryonic PNS of *Drosophila*  
648 promoting the development of oenocytes. *Development* 128: 711-722.



649 Schnepf, B., G. Grumblin, T. Donaldson and A. Simcox, 1996 Vein is a novel  
650 component in the Drosophila epidermal growth factor receptor pathway with similarity to  
651 the neuregulins. *Genes Dev* 10: 2302-2313.

652 Scuderi, A., and A. Letsou, 2005 Amnioserosa is required for dorsal closure in  
653 Drosophila. *Dev Dyn* 232: 791-800.

654 Shen, W., X. Chen, O. Cormier, D. C. Cheng, B. Reed *et al.*, 2013 Modulation of  
655 morphogenesis by Egfr during dorsal closure in Drosophila. *PLoS One* 8: e60180.

656 Shen, W., and J. Sun, 2017 Dynamic Notch Signaling Specifies Each Cell Fate in  
657 Drosophila Spermathecal Lineage. *G3 (Bethesda)* 7: 1417-1427.

658 Shilo, B. Z., 2005 Regulating the dynamics of EGF receptor signaling in space and time.  
659 *Development* 132: 4017-4027.

660 Shirai, T., A. Maehara, N. Kiritooshi, F. Matsuzaki, H. Handa *et al.*, 2003 Differential  
661 requirement of EGFR signaling for the expression of defective proventriculus gene in the  
662 Drosophila endoderm and ectoderm. *Biochem Biophys Res Commun* 311: 473-477.

663 Shwartz, A., S. Yogev, E. D. Schejter and B. Z. Shilo, 2013 Sequential activation of ETS  
664 proteins provides a sustained transcriptional response to EGFR signaling. *Development*  
665 140: 2746-2754.

666 Singh, S. R., Y. Liu, J. Zhao, X. Zeng and S. X. Hou, 2016 The novel tumour suppressor  
667 Madm regulates stem cell competition in the Drosophila testis. *Nat Commun* 7: 10473.

668 Sun, J., and W. M. Deng, 2007 Hindsight mediates the role of notch in suppressing  
669 hedgehog signaling and cell proliferation. *Dev Cell* 12: 431-442.

670 Terriente-Felix, A., J. Li, S. Collins, A. Mulligan, I. Reekie *et al.*, 2013 Notch cooperates  
671 with Lozenge/Runx to lock haemocytes into a differentiation programme. *Development*  
672 140: 926-937.

673 Thiagalingam, A., A. De Bustros, M. Borges, R. Jasti, D. Compton *et al.*, 1996 RREB-1,  
674 a novel zinc finger protein, is involved in the differentiation response to Ras in human  
675 medullary thyroid carcinomas. *Mol Cell Biol* 16: 5335-5345.

676 Thurmond, J., J. L. Goodman, V. B. Strelets, H. Attrill, L. S. Gramates *et al.*, 2019  
677 FlyBase 2.0: the next generation. *Nucleic Acids Res* 47: D759-D765.

678 Tsuda, L., M. Kaido, Y. M. Lim, K. Kato, T. Aigaki *et al.*, 2006 An NRSF/REST-like  
679 repressor downstream of Ebi/SMRTER/Su(H) regulates eye development in *Drosophila*.  
680 *EMBO J* 25: 3191-3202.

681 Tsuda, L., R. Nagaraj, S. L. Zipursky and U. Banerjee, 2002 An EGFR/Ebi/Sno pathway  
682 promotes delta expression by inactivating Su(H)/SMRTER repression during inductive  
683 notch signaling. *Cell* 110: 625-637.

684 Wieschaus, E., C. Nüsslein-Volhard and G. Jürgens, 1984 Mutations affecting the pattern  
685 of the larval cuticle in *Drosophila melanogaster*. *Wilhelm Roux's Archives of*  
686 *Developmental Biology* 193: 296-307.

687 Wilk, R., A. T. Pickup, J. K. Hamilton, B. H. Reed and H. D. Lipshitz, 2004 Dose-  
688 sensitive autosomal modifiers identify candidate genes for tissue autonomous and tissue  
689 nonautonomous regulation by the *Drosophila* nuclear zinc-finger protein, *hindsight*.  
690 *Genetics* 168: 281-300.

691 Wilk, R., B. H. Reed, U. Tepass and H. D. Lipshitz, 2000 The hindsight gene is required  
692 for epithelial maintenance and differentiation of the tracheal system in *Drosophila*. *Dev*  
693 *Biol* 219: 183-196.

694 Xiang, J., J. Bandura, P. Zhang, Y. Jin, H. Reuter *et al.*, 2017 EGFR-dependent TOR-  
695 independent endocycles support *Drosophila* gut epithelial regeneration. *Nat Commun* 8:  
696 15125.

697 Yip, M. L., M. L. Lamka and H. D. Lipshitz, 1997 Control of germ-band retraction in  
698 *Drosophila* by the zinc-finger protein HINDSIGHT. *Development* 124: 2129-2141.

699 Zhang, W., B. J. Thompson, V. Hietakangas and S. M. Cohen, 2011 MAPK/ERK  
700 signaling regulates insulin sensitivity to control glucose metabolism in *Drosophila*. *PLoS*  
701 *Genet* 7: e1002429.

702

703

704

705

706

707 **Figure 1. The embryonic *hnt* mutant phenotype includes hallmarks of reduced**  
708 **EGFR signaling.**  
709 (A) Wild-type stage 15 embryo immunostained using the neuronal marker 22C10  
710 showing typical development of the PNS, including clusters of ventral neurons in the  
711 second and third thoracic segments (arrowheads) and five neurons associated with lateral  
712 chordotonal organ clusters in the abdominal segments (blue with white outline  
713 arrowheads and inset A'). (B) 22C10 immunostained *hnt* mutant embryo showing the  
714 absence of neurons (arrowheads *cf.* panel A) including two of the five neurons of each  
715 lateral chordotonal cluster (blue with white outline arrowheads and inset B'). (C)  
716 TRITC-phalloidin stained stage 15 wild-type embryo showing the f-actin rich structure of  
717 the lateral chordotonal lch5 organ clusters (asterisks) and the dorsolateral chordotonal  
718 organ lch1 (arrowheads). (D) TRITC-phalloidin stained *hnt* mutant embryo showing  
719 differentiated lateral chordotonal organs that are reduced in number (asterisks) and the  
720 absence of the dorsolateral chordotonal lch1 organ. (E) Wild-type embryo showing *UAS-*  
721 *GFP<sup>nls</sup>* expression using the oenocyte-specific driver *BO-GAL4*. (F) *hnt<sup>XE81</sup>* mutant  
722 embryo showing reduced number of GFP-positive oenocytes (*BO-GAL4 > UAS-GFP<sup>nls</sup>*)  
723 and failure to form oenocyte clusters. Scale bars represent 20 microns (C,D).

724

725 **Figure 2. The viable temperature sensitive hypomorphic *hnt* allele *pebbled* (*hnt<sup>peb</sup>*) is**  
726 **enhanced by the viable hypomorphic MAPK allele *rolled* (*rt<sup>1</sup>*).**

727 (A) Anti-Arm immunostained wild-type pupal retina 48h APF showing the normal  
728 organization of ommatidial units. (B) Cartoon of wild-type ommatidial structure showing  
729 four cone cells (red - c), two primary pigment cells (yellow - 1°), and the secondary

730 (white - 2°) and tertiary pigment cells (white - 3°) of the interommatidial lattice. Also  
731 depicted as a part of the lattice are the interommatidial bristles (dark green). (C) Anti-  
732 Arm immunostained pupal retina (48h APF) of *peb* mutant raised at the permissive  
733 temperature (25°C) showing normal ommatidial organization. (D) Anti-Arm  
734 immunostained pupal retina (48h APF) of *rl* mutant raised at 25°C showing normal  
735 ommatidial organization. (E) Anti-Arm immunostained pupal retina (48h APF) of *peb*  
736 mutant raised at the restrictive temperature (29°C) showing a disruption in ommatidial  
737 organization. (F) Anti-Arm immunostained pupal retina (48h APF) of *peb; rl* double  
738 mutant raised at the permissive temperature of 25°C showing disrupted ommatidial  
739 organization, indicating a genetic enhancement of *peb* under what is normally the  
740 permissive condition. (G) Stacked bar graph showing the average frequency of observed  
741 cone cells per ommatidium (1-5 CC) for *peb* 25°C, *rl* 25°C, *peb* 29°C, and *peb; rl* 25°C.

742

743 **Figure 3. Global overexpression of *hnt* results in ectopic *DPax2* expression.**

744 (A) Wild-type embryo showing *DPax2* mRNA distribution expression using FISH  
745 (green) (B) Embryo overexpressing *hnt* (*daGAL4 > UAS-GFP-hnt*) showing ectopic and  
746 increased levels of *DPax2* mRNA using FISH (green). (C) Wild-type embryo showing  
747 *DPax2* expression using anti-*DPax2* immunostaining (blue). (D) Embryo overexpressing  
748 *hnt* immunostained for *DPax2* (blue) showing ectopic *DPax2* in large regions of lateral  
749 ectoderm. (E) Wild-type embryo showing expression of the *shaven* reporter gene  
750 construct *DPax2<sup>B2</sup>dsRed* (blue) as faithful to endogenous *DPax2* expression throughout  
751 the developing PNS. (F) Embryo overexpressing *hnt* showing ectopic *DPax2* expression  
752 using the *DPax2<sup>B2</sup>dsRed* reporter gene. (G) Embryo immunostained for *DPax2* (blue) and

753 Hnt (yellow) showing that this embryo is a *hnt*<sup>XE81</sup> mutant (absence of Hnt signal) and  
754 DPax2 throughout the PNS.

755

756 **Figure 4. Ectopic DPax2 expression associated with *hnt* overexpression requires**  
757 **EGFR signaling.**

758 (A-A'') Immunostained *pan-GFP-hnt* embryo (*daGAL4 > UAS-GFP-hnt*) showing Hnt  
759 (yellow, A') and associated ectopic DPax2 (Blue, A''). (B-B'') *Pan-GFP-hnt* embryo  
760 that carries the loss-of-function allelic combination *Egfr*<sup>la15</sup>/*Egfr*<sup>f2</sup>, showing absence of  
761 ectopic DPax2 expression using the DPax2<sup>B2</sup>*dsRed* reporter. (C-C'') *Pan-GFP-hnt*  
762 embryo heterozygous for the *Egfr*<sup>f2</sup> allele showing reduced ectopic expression of the  
763 DPax2<sup>B2</sup>*dsRed* reporter. (D) Wild-type stage 15 embryo showing that expression of the  
764 DPax2<sup>B1</sup>*GFP* reporter gene is consistent with endogenous DPax2 (*cf.* Fig. 3C). (E)  
765 Embryo expressing the DPax2<sup>B1</sup>*GFP* reporter gene in the background of globally  
766 activated EGFR signaling (*daGAL4 > UAS-sSpi*) showing ectopic DPax2 expression. (F)  
767 The loss-of-function allelic combination *Egfr*<sup>la15</sup>/*Egfr*<sup>f2</sup> in the absence of *hnt*  
768 overexpression, showing DPax2 expression using the DPax2<sup>B2</sup>*dsRed* reporter.  
769

770 **Figure 5. GBR and premature amnioserosa death of *hnt*<sup>NP7278ex1</sup> is rescued by**  
771 **caspase suppression and by activation of EGFR signaling.**

772 (A) Anti-Hnt immunostained showing AS expression prior to onset of GBR. (B) Live  
773 confocal image of *hnt*<sup>NP7278ex1/+</sup>; *UAS-GFP<sup>nls</sup> Ubi-DEcadherin-GFP/+* embryo showing  
774 AS expression associated with *hnt*<sup>NP7278ex1</sup> prior to onset of GBR. (C) Same embryo  
775 shown in B imaged 67 minutes later during initiation of GBR. The AS is folded over the

776 extended tail and lamellopodia-type extensions contact the epidermis (white arrowheads.  
777 **(D)** Live confocal image of *hnt*<sup>NP7278ex1/Y</sup>; *UAS-GFP<sup>nls</sup> Ubi-DEcadherin-GFP/+* mutant  
778 embryo at onset of GBR showing a failure of AS to maintain the fold over the posterior  
779 tail. AS apoptotic corpses are also present (white arrowheads). **(E)** Terminal GBR  
780 failure phenotype of *hnt*<sup>NP7278ex1/Y</sup>; *UAS-GFP<sup>nls</sup> Ubi-DEcadherin-GFP/+* mutant embryo  
781 showing tail-up phenotype and AS remnant (white arrowhead). **(F)** Control rescue  
782 embryo: *hnt*<sup>NP7278ex1</sup> or *hnt*<sup>NP7278ex1/hnt<sup>XE81</sup> mutant with *UAS-GFP<sup>nls</sup> Ubi-DEcadherin*  
783 showing rescue by *pebBAC*<sup>CH321-46J02</sup>. **(G)** GBR complete rescue of *hnt*<sup>NP7278ex1</sup> by *UAS-*  
784 *sSpi*. **(H)** GBR complete rescue of *hnt*<sup>NP7278ex1</sup> by *UAS-p35*. **(I)** GBR complete rescue of  
785 *hnt*<sup>NP7278ex1</sup> by *UAS-Ras85D*<sup>V12</sup>. **(J)** GBR complete rescue of *hnt*<sup>NP7278ex1</sup> by *UAS-pnt*<sup>P1</sup>.  
786 **(K)** Stacked bar graph showing the frequency of GBR defects in *hnt*<sup>NP7278ex1</sup> mutants and  
787 rescue backgrounds.  
788</sup>



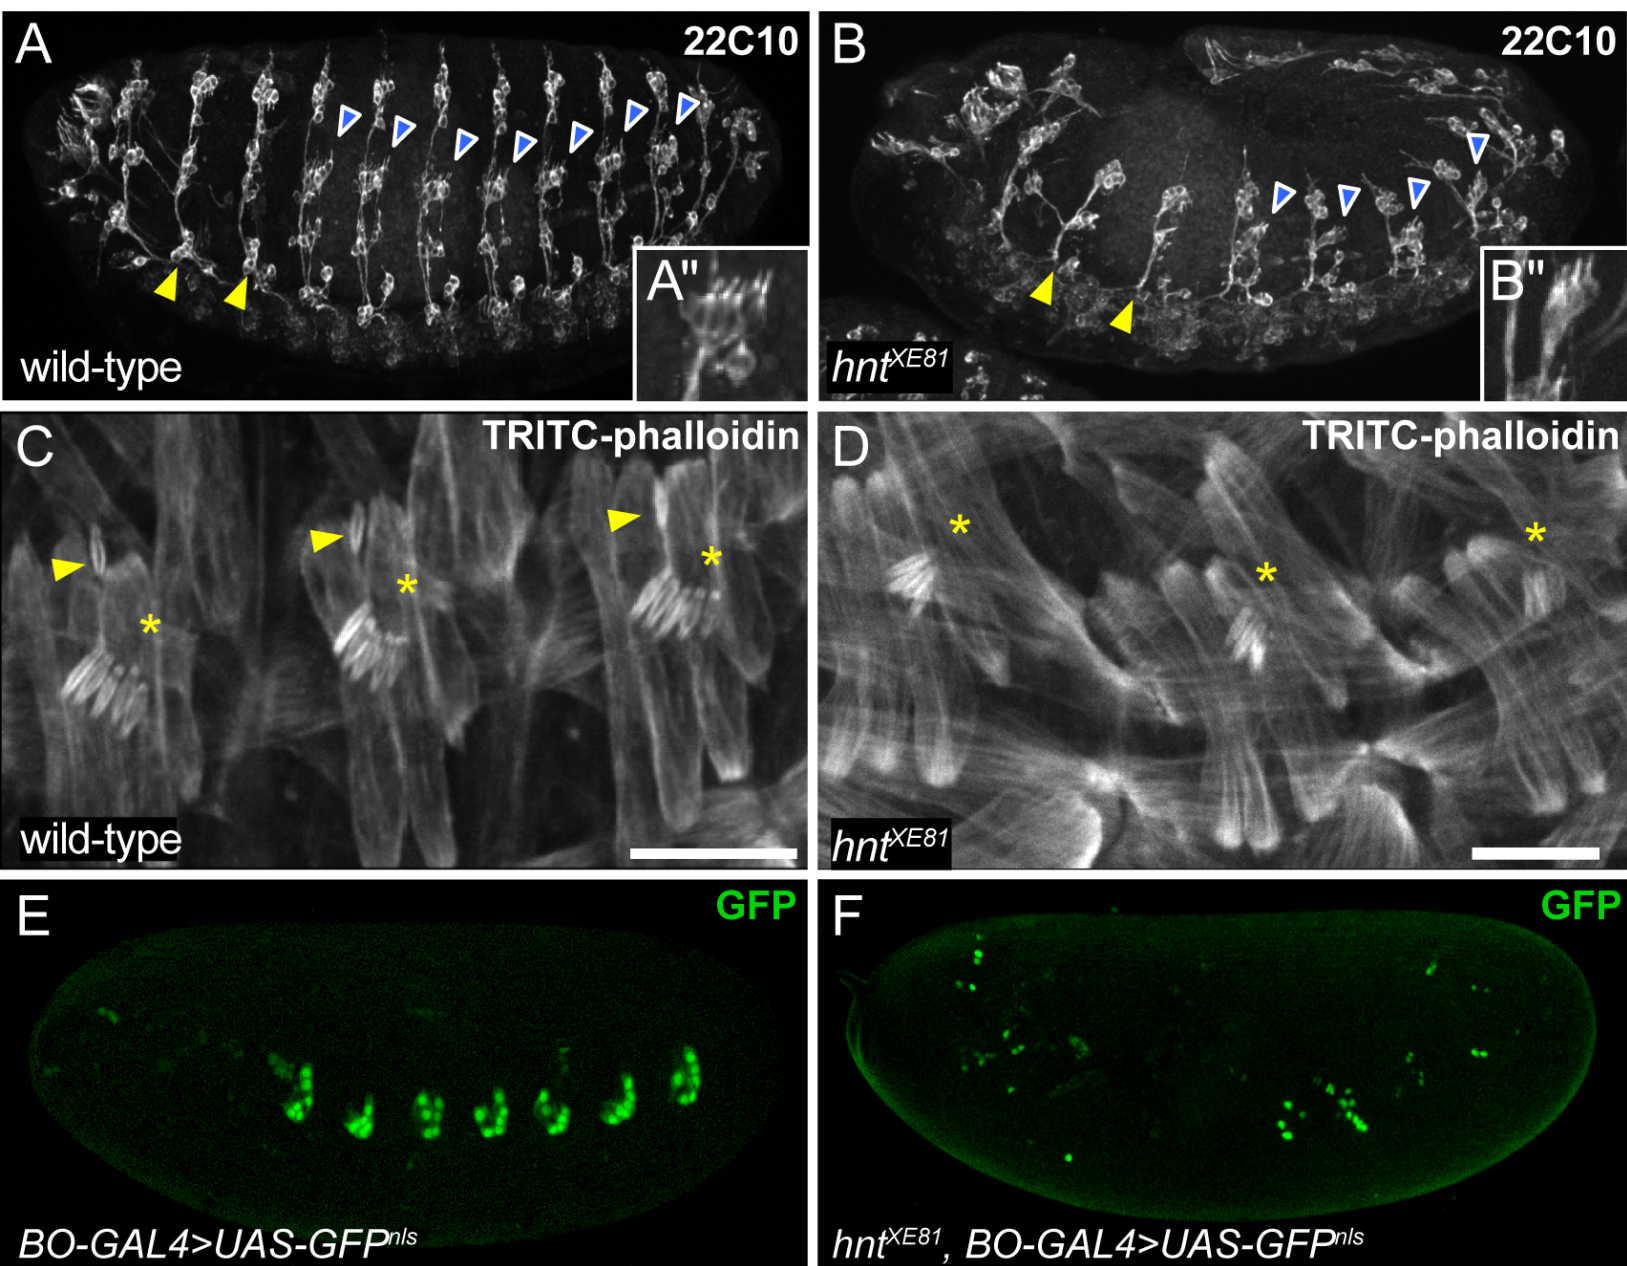



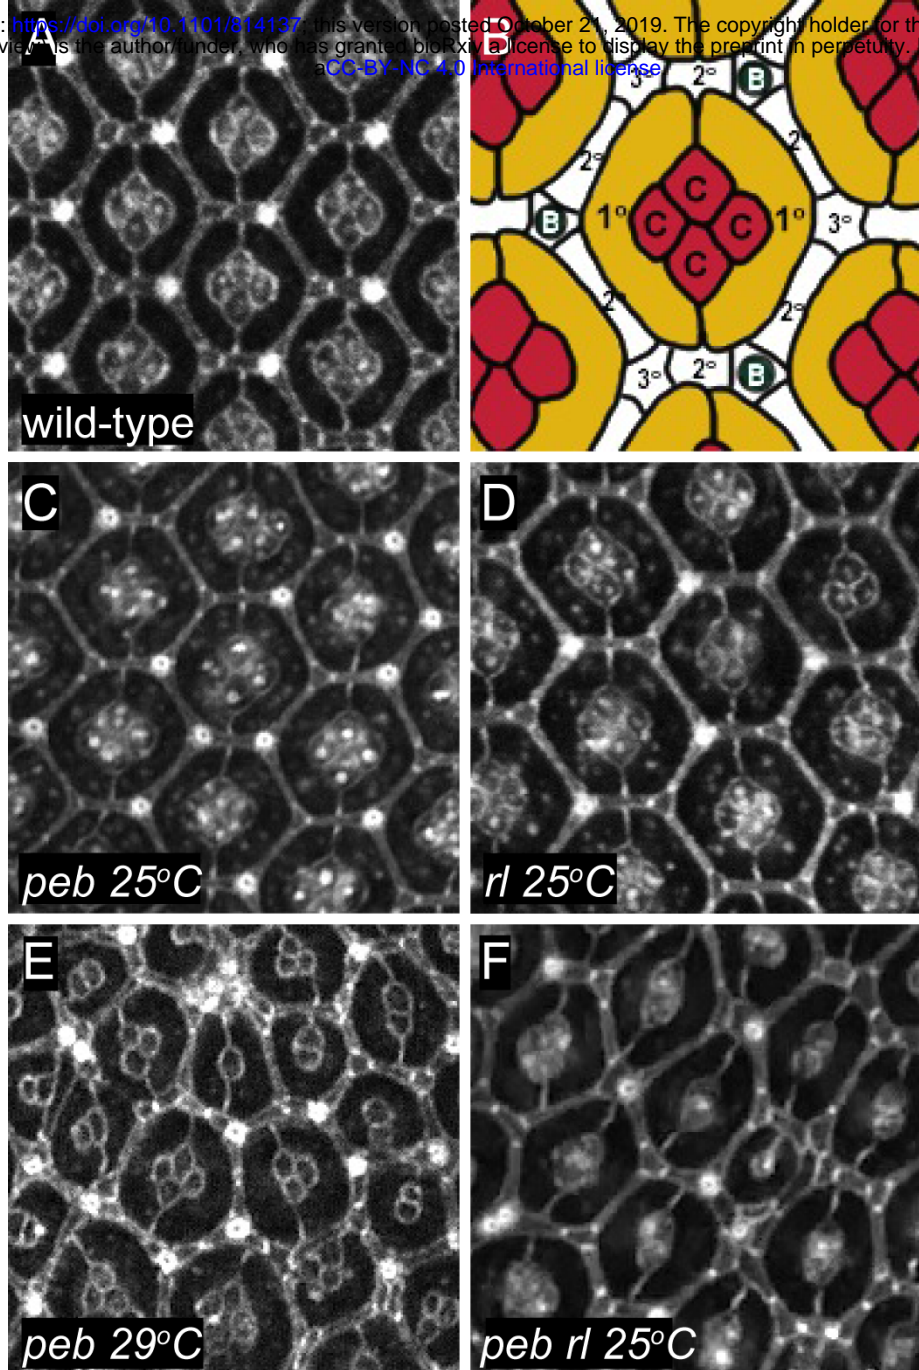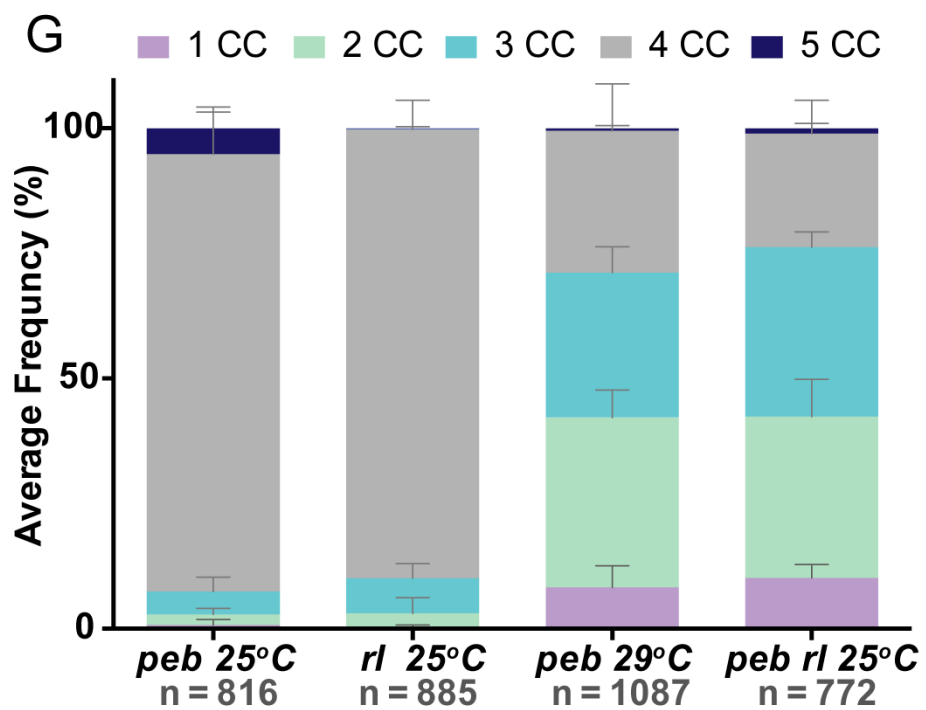

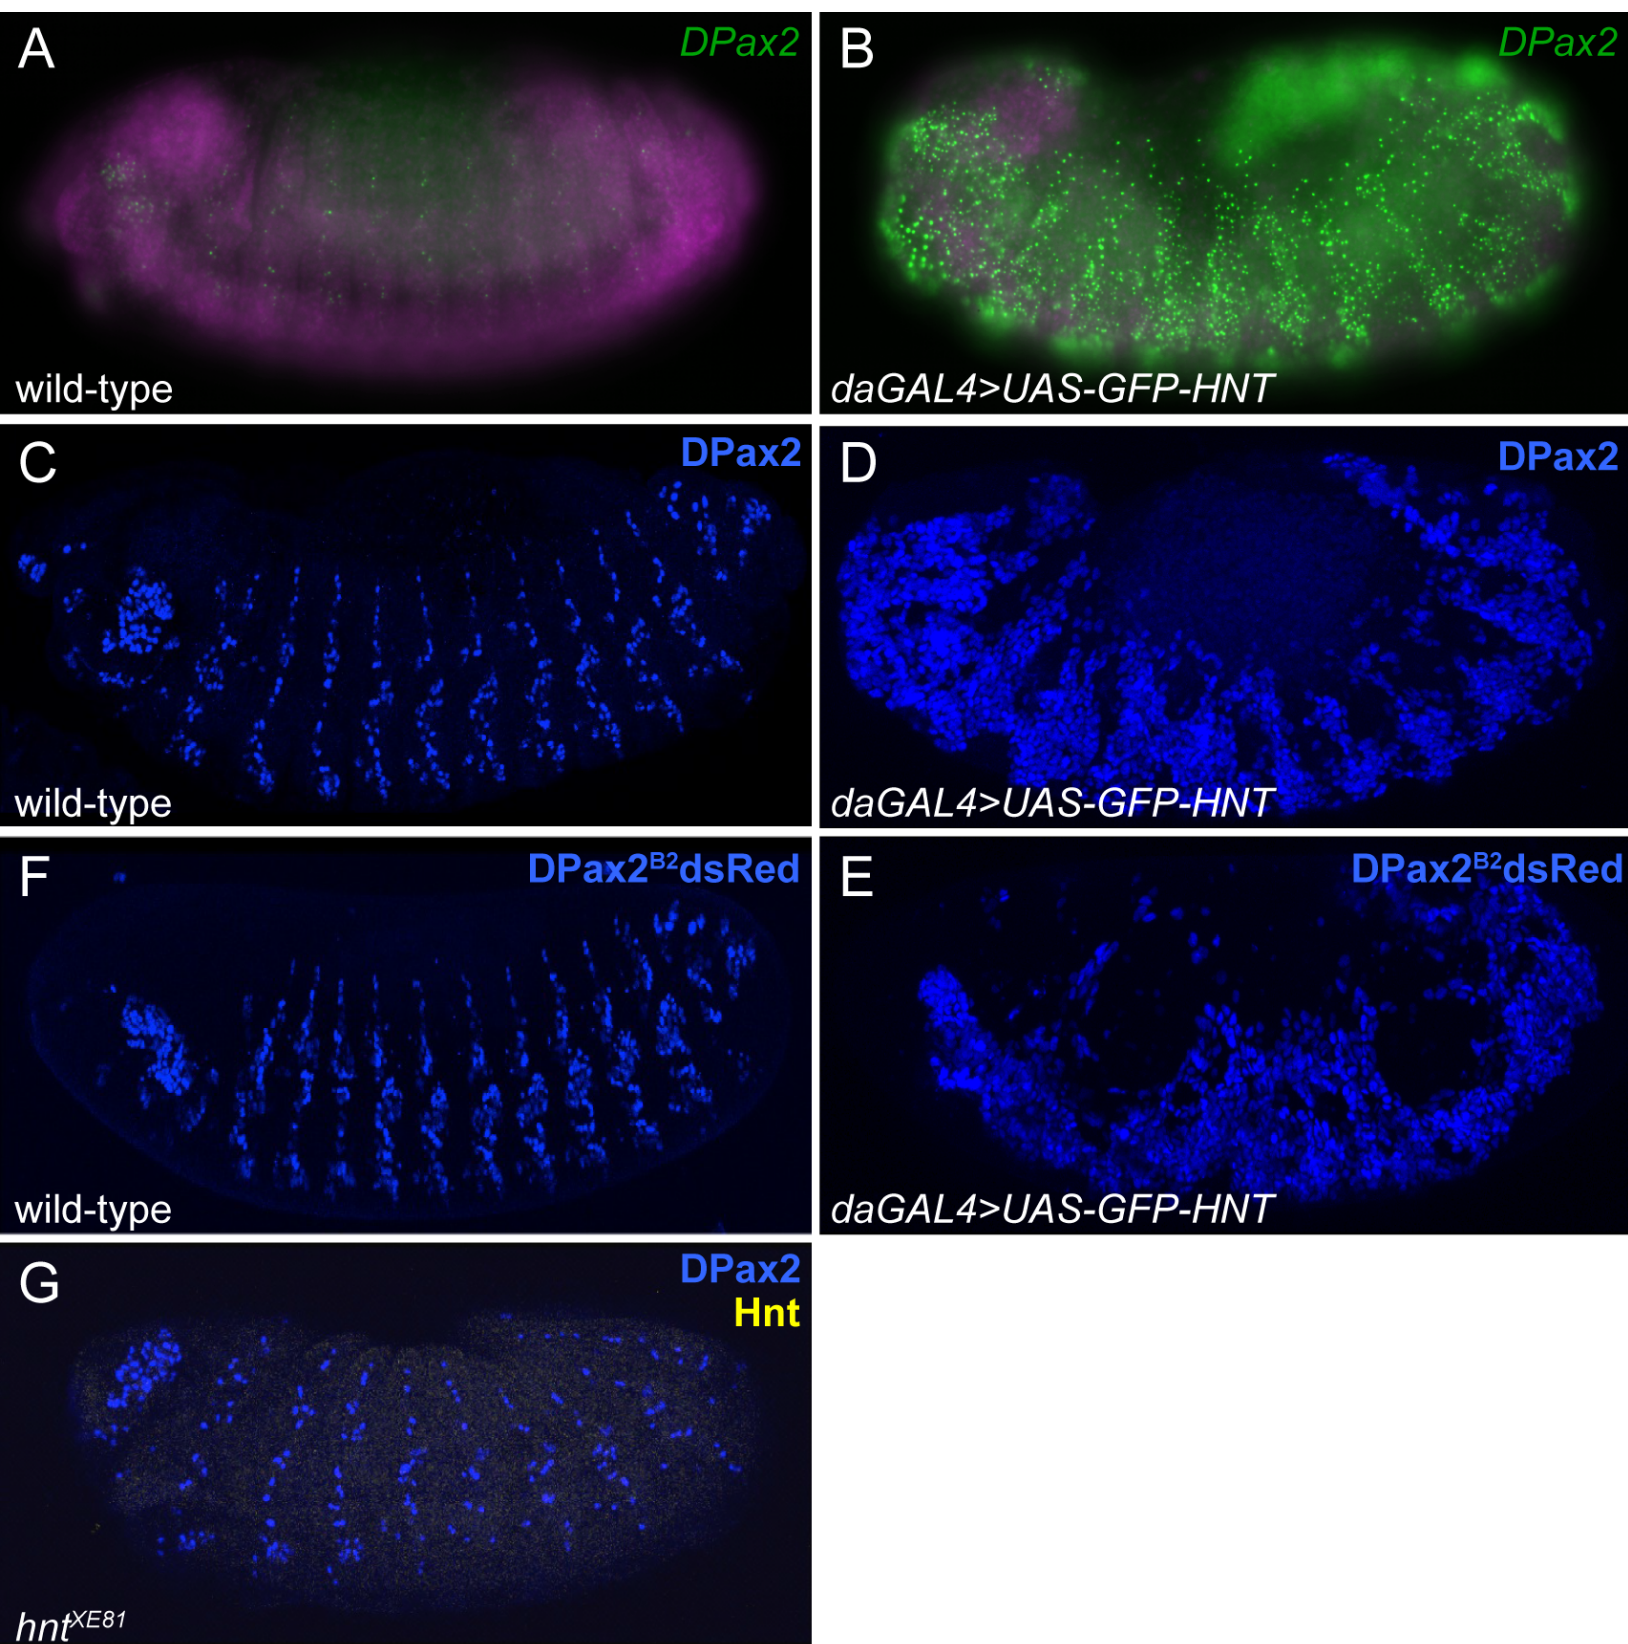



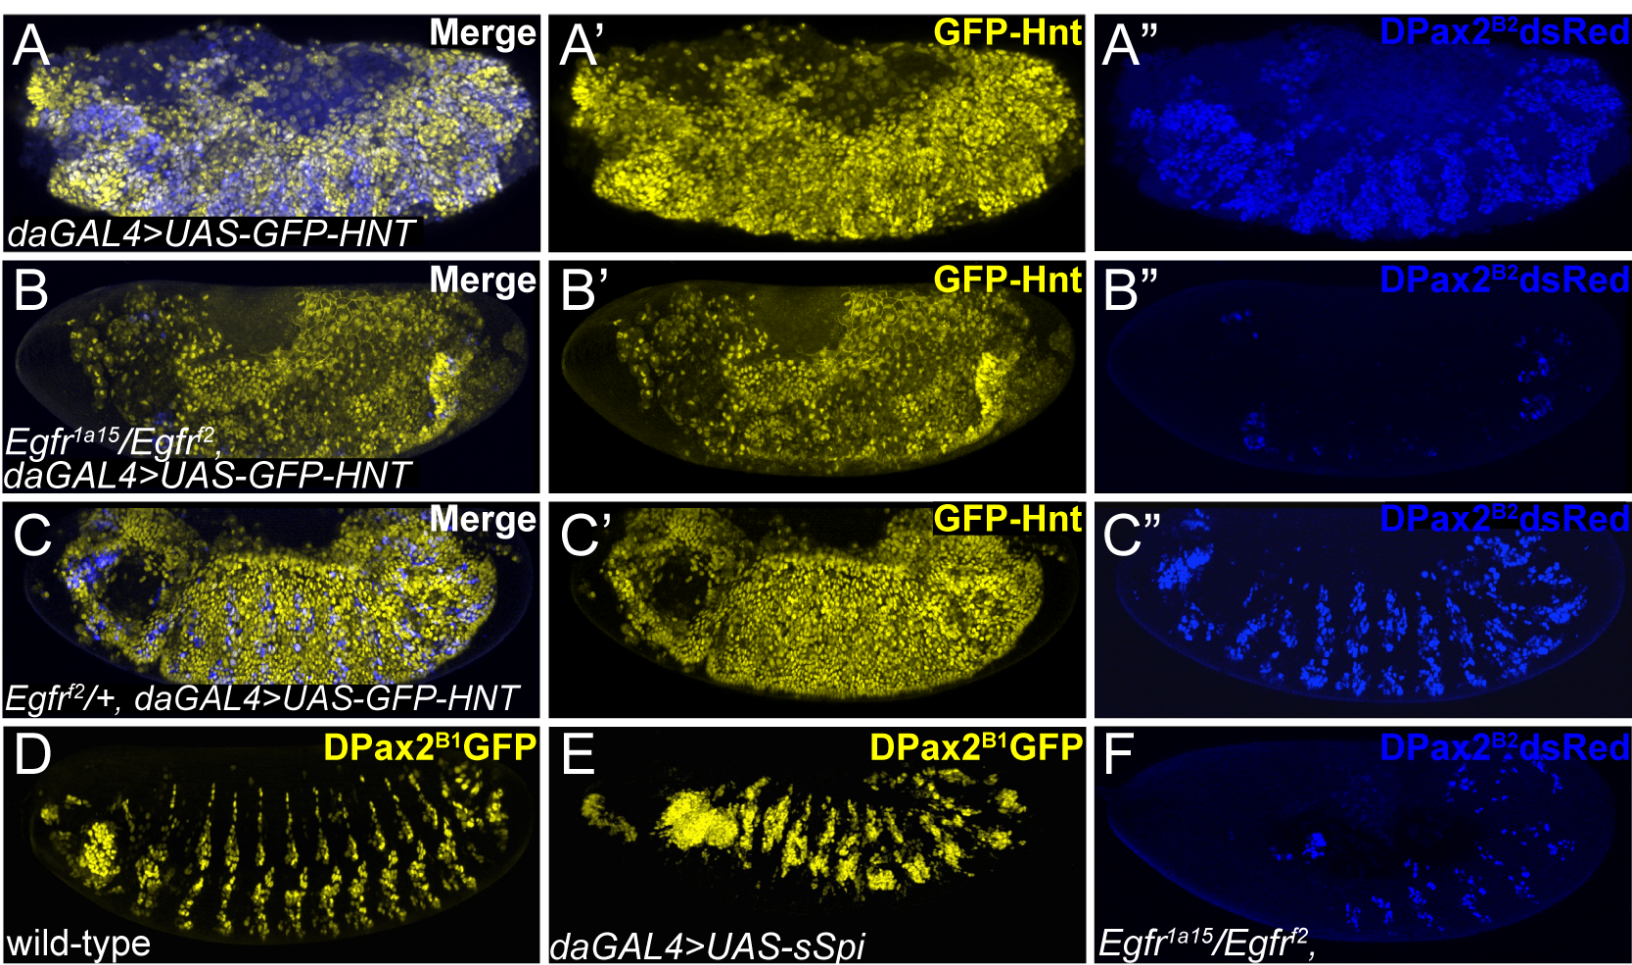

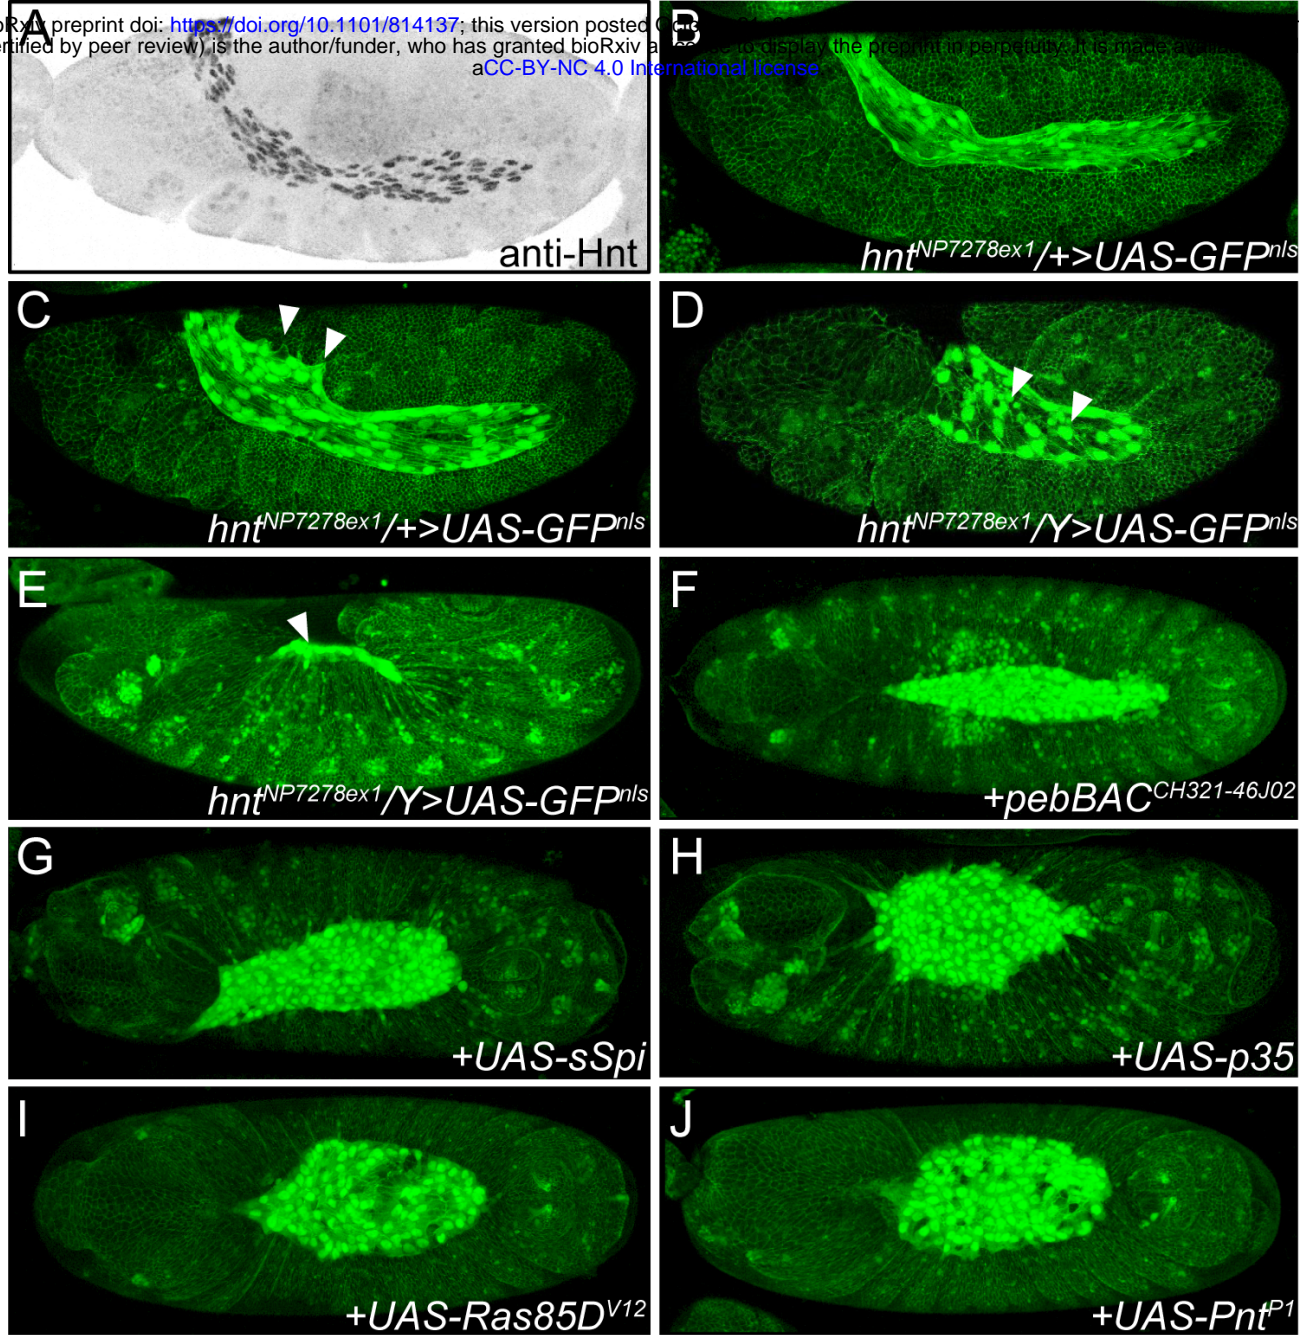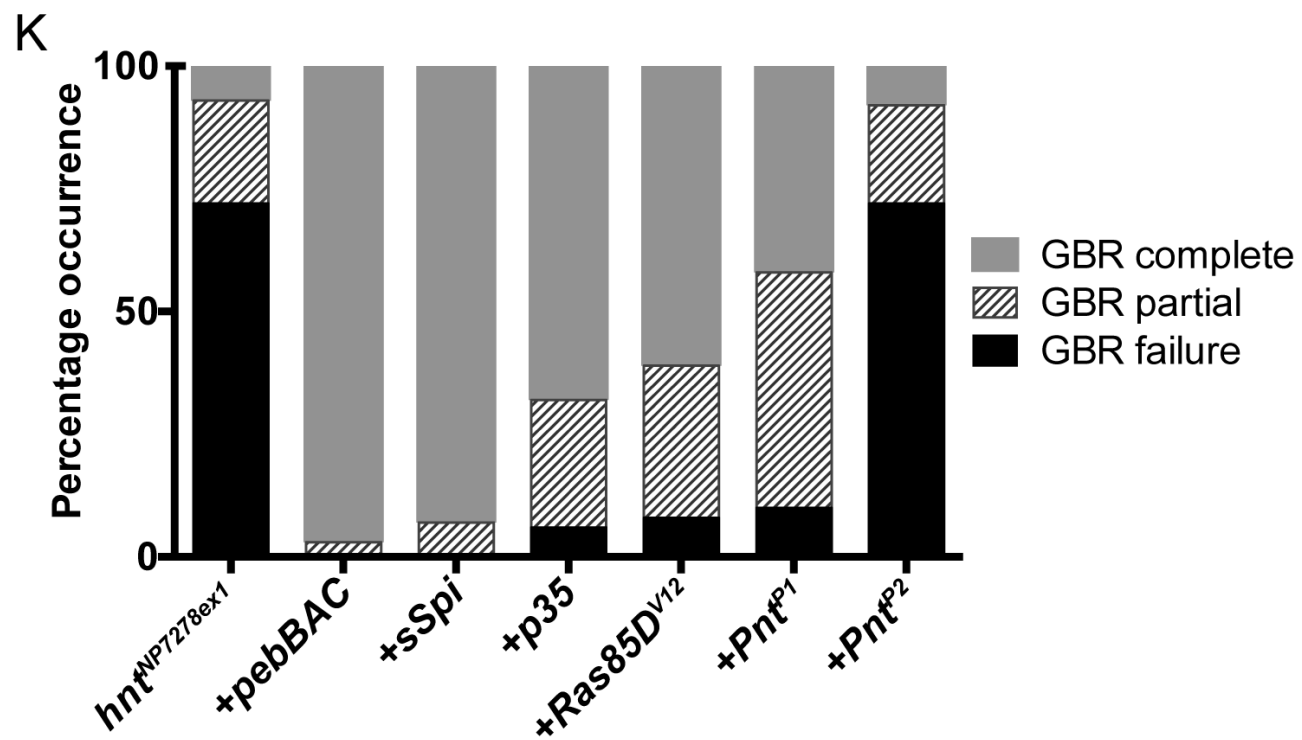

Source: https://www.biorxiv.org/content/biorxiv/early/2019/10/21/814137.full.pdf
